# Supplementary material for: Comparing polysaccharide decomposition between the type strains Gramella echinicola KMM 6050T (DSM 19838T) and Gramella portivictoriae UST040801-001T (DSM 23547T), and emended description of Gramella echinicola Nedashkovskaya et al. 2005 emend. Shahina et al. 2014 and Gramella portivictoriae Lau et al. 2005
Source: PubMed Central journal article supplement (PMC4891872; doi:10.1186/s40793-016-0163-9), 2016-06-03
Supplement: 40793_2016_163_MOESM1_ESM.pdf [file 40793_2016_163_MOESM1_ESM.pdf]

# Comparing polysaccharide decomposition among the type strains *Gramella echinicola* KMM 6050<sup>T</sup> (DSM 19838<sup>T</sup>) and *Gramella portivictoriae* UST040801-001<sup>T</sup> (DSM 23547<sup>T</sup>), and emended description of *Gramella echinicola* Nedashkovskaya et al. 2005 emend. Shahina et al. 2014 and *Gramella portivictoriae* Lau et al. 2005

Irina Panschin<sup>1</sup>, Sixing Huang<sup>1</sup>, Jan P. Meier-Kolthoff<sup>1</sup>, Brian J. Tindall<sup>1</sup>, Manfred Rohde<sup>2</sup>, Alla Lapidus<sup>3</sup>, James Han<sup>4</sup>, Stephan Trong<sup>4</sup>, Matthew Haynes<sup>4</sup>, T.B.K. Reddy<sup>4</sup>, Marcel Huntemann<sup>4</sup>, Amrita Pati<sup>4</sup>, Natalia N. Ivanova<sup>4</sup>, Konstantinos Mavromatis<sup>5</sup>, Victor Markowitz<sup>5</sup>, Tanja Woyke<sup>4</sup>, Markus Göker<sup>1</sup>, Hans-Peter Klenk<sup>6</sup>, Nikos C. Kyrpides<sup>5,7</sup> and Richard L. Hahnke<sup>1,\*</sup>

<sup>1</sup> Leibniz Institute DSMZ – German Collection of Microorganisms and Cell Cultures, Braunschweig, Germany. <sup>2</sup> Helmholtz Centre for Infection Research, Braunschweig, Germany. <sup>3</sup> Algorithmic Biology Lab, St. Petersburg Academic University, St.Petersburg, Russia. <sup>4</sup> Genome Biology Program, Department of Energy Joint Genome Institute, Walnut Creek, California, USA. <sup>5</sup> Biological Data Management and Technology Center, Lawrence Berkeley National Laboratory, Berkeley, California, USA. <sup>6</sup> School of Biology, Newcastle University, Newcastle upon Tyne, UK. <sup>7</sup> School of Biology, King Abdulaziz University, Jeddah, Saudi Arabia.

\*Corresponding author: Richard L. Hahnke, richard.hahnke@dsmz.de

Additional file 1 – Supporting Information – Tables

Table S1: Peptidases or homologues in the genome of *Gramella echinicola* DSM 19838<sup>T</sup>.

| Accession No.  | family | Peptidase or homologue                                                                 |
|----------------|--------|----------------------------------------------------------------------------------------|
| WP_026932724.1 | M28X   | family M28 unassigned peptidases ( <i>Gramella forsetii</i> )                          |
| WP_026932733.1 | M43B   | ulilysin ( <i>Gramella forsetii</i> )                                                  |
| WP_026932742.1 | S33    | SCO7095-type peptidase ( <i>Gramella forsetii</i> )                                    |
| WP_026932743.1 | M24B   | subfamily M24B unassigned peptidases ( <i>Gramella forsetii</i> )                      |
| WP_026932773.1 | M14X   | family M14 non-peptidase homologues ( <i>Croceibacter atlanticus</i> )                 |
| WP_026932777.1 | A08    | signal peptidase II ( <i>Gramella forsetii</i> )                                       |
| WP_026932804.1 | M50B   | subfamily M50B unassigned peptidases ( <i>Gramella forsetii</i> )                      |
| WP_026932839.1 | S12    | family S12 unassigned peptidases ( <i>Zunongwangia profunda</i> )                      |
| WP_026932851.1 | U32    | family U32 unassigned peptidases ( <i>Elizabethkingia anophelis</i> )                  |
| WP_026932891.1 | M23B   | subfamily M23B unassigned peptidases ( <i>Gramella forsetii</i> )                      |
| WP_026932916.1 | S41A   | CtpC peptidase ( <i>Zobellia galactanivorans</i> )                                     |
| WP_026932918.1 | M01    | family M1 unassigned peptidases ( <i>Gramella forsetii</i> )                           |
| WP_026932919.1 | S08A   | subfamily S8A unassigned peptidases ( <i>Zunongwangia profunda</i> )                   |
| WP_026932932.1 | C40    | family C40 unassigned peptidases ( <i>Gramella forsetii</i> )                          |
| WP_026932938.1 | S12    | family S12 unassigned peptidases ( <i>Zunongwangia profunda</i> )                      |
| WP_026932956.1 | S09A   | prolyl oligopeptidase ( <i>Gramella forsetii</i> )                                     |
| WP_026932972.1 | S09X   | family S9 unassigned peptidases ( <i>Gramella forsetii</i> )                           |
| WP_026932975.1 | U32    | family U32 unassigned peptidases ( <i>Chthonomonas calidirosea</i> )                   |
| WP_026932978.1 | C44    | family C44 unassigned peptidases ( <i>Gramella forsetii</i> )                          |
| WP_026932996.1 | T02    | family T2 unassigned peptidases ( <i>Gramella forsetii</i> )                           |
| WP_026933028.1 | S33    | family S33 unassigned peptidases ( <i>Gramella forsetii</i> )                          |
| WP_026933039.1 | S09B   | subfamily S9B unassigned peptidases ( <i>Algoriphagus</i> sp. PR1)                     |
| WP_026933040.1 | M28D   | subfamily M28D unassigned peptidases ( <i>Cellulophaga algicola</i> )                  |
| WP_026933047.1 | I39    | family I39 unassigned peptidase inhibitor homologues ( <i>Pedobacter heparinus</i> )   |
| WP_026933078.1 | S12    | family S12 unassigned peptidases                                                       |
| WP_026933102.1 | S41A   | CtpC peptidase ( <i>Lacinutrix</i> sp. 5H-3-7-4)                                       |
| WP_026933117.1 | S12    | family S12 unassigned peptidases ( <i>Marivirga tractuosa</i> )                        |
| WP_026933119.1 | C56    | family C56 non-peptidase homologues ( <i>Gramella forsetii</i> )                       |
| WP_026933125.1 | S33    | family S33 unassigned peptidases ( <i>Gramella forsetii</i> )                          |
| WP_026933171.1 | M23B   | Mername-AA292 peptidase ( <i>Gramella forsetii</i> )                                   |
| WP_026933172.1 | S16    | DNA repair protein RadA ( <i>Escherichia coli</i> ) ( <i>Croceibacter atlanticus</i> ) |
| WP_026933179.1 | C44    | glucosamine-fructose-6-phosphate aminotransferase                                      |
| WP_026933183.1 | M61    | family M61 unassigned peptidases ( <i>Gramella forsetii</i> )                          |
| WP_026933214.1 | M16B   | subfamily M16B non-peptidase homologues ( <i>Robiginitalea biformata</i> )             |
| WP_026933278.1 | S09X   | family S9 non-peptidase homologues                                                     |
| WP_026933290.1 | S33    | family S33 unassigned peptidases ( <i>Carnobacterium</i> sp. WN1359)                   |
| WP_026933294.1 | M79    | family M79 unassigned peptidases ( <i>Gramella forsetii</i> )                          |
| WP_026933298.1 | S12    | family S12 unassigned peptidases ( <i>Cellulophaga lytica</i> )                        |
| WP_026933306.1 | M24B   | aminopeptidase P (bacteria) ( <i>Gramella forsetii</i> )                               |
| WP_026933311.1 | S33    | family S33 non-peptidase homologues ( <i>Microscilla marina</i> )                      |
| WP_026933312.1 | M20A   | subfamily M20A unassigned peptidases ( <i>Fulvirga imtechensis</i> )                   |

Continued on next page

Table S1: (continued)

| Accession No.  | family | Peptidase or homologue                                                                                           |
|----------------|--------|------------------------------------------------------------------------------------------------------------------|
| WP_026933317.1 | M20F   | subfamily M20F unassigned peptidases ( <i>Lacinutrix</i> sp. 5H-3-7-4)                                           |
| WP_026933337.1 | M56    | family M56 unassigned peptidases ( <i>Gramella forsetii</i> )                                                    |
| WP_026933365.1 | M38    | family M38 non-peptidase homologues ( <i>Gramella forsetii</i> )                                                 |
| WP_026933394.1 | T02    | Chryseobacterium meningosepticum-type N4-(beta-N-acetylglucosaminy1)-L-asparaginase ( <i>Gramella forsetii</i> ) |
| WP_026933400.1 | S33    | family S33 unassigned peptidases ( <i>Pseudomonas mendocina</i> )                                                |
| WP_026933464.1 | S33    | family S33 non-peptidase homologues ( <i>Gramella forsetii</i> )                                                 |
| WP_026933469.1 | S14    | peptidase Clp (type 1) ( <i>Gramella forsetii</i> )                                                              |
| WP_026933476.1 | M23B   | Mername-AA292 peptidase ( <i>Gramella forsetii</i> )                                                             |
| WP_026933502.1 | M28E   | subfamily M28E unassigned peptidases ( <i>Gramella forsetii</i> )                                                |
| WP_026933517.1 | M03A   | subfamily M3A unassigned peptidases ( <i>Gramella forsetii</i> )                                                 |
| WP_026933566.1 | C26    | family C26 non-peptidase homologues ( <i>Gramella forsetii</i> )                                                 |
| WP_026933597.1 | S33    | family S33 unassigned peptidases ( <i>Gramella forsetii</i> )                                                    |
| WP_026933616.1 | S66    | family S66 unassigned peptidases ( <i>Gramella forsetii</i> )                                                    |
| WP_026933621.1 | C44    | AsnB protein ( <i>Gramella forsetii</i> )                                                                        |
| WP_026933639.1 | S51    | alpha-aspartyl dipeptidase (eukaryote) ( <i>Gramella forsetii</i> )                                              |
| WP_026933644.1 | M01    | family M1 unassigned peptidases ( <i>Gramella forsetii</i> )                                                     |
| WP_026933677.1 | M41    | Afg3-like protein 2 ( <i>Gramella forsetii</i> )                                                                 |
| WP_026933683.1 | M14X   | family M14 non-peptidase homologues ( <i>Polaribacter</i> sp. MED152)                                            |
| WP_026933697.1 | C26    | TRP3 protein                                                                                                     |
| WP_026933711.1 | C56    | family C56 non-peptidase homologues ( <i>Spirosoma linguale</i> )                                                |
| WP_026933763.1 | M38    | family M38 non-peptidase homologues ( <i>Gramella forsetii</i> )                                                 |
| WP_026933764.1 | M38    | family M38 non-peptidase homologues ( <i>Spirosoma linguale</i> )                                                |
| WP_026933770.1 | M14X   | family M14 non-peptidase homologues ( <i>Gramella forsetii</i> )                                                 |
| WP_026933778.1 | M20B   | peptidase T ( <i>Gillisia limnaea</i> )                                                                          |
| WP_026933868.1 | S33    | family S33 non-peptidase homologues ( <i>Gramella forsetii</i> )                                                 |
| WP_026933879.1 | S09D   | glutamyl endopeptidase C ( <i>Gramella forsetii</i> )                                                            |
| WP_026933895.1 | M20D   | carboxypeptidase Ss1 ( <i>Gillisia limnaea</i> )                                                                 |
| WP_026933899.1 | S33    | CPO-A2 ( <i>Streptomyces aureofaciens</i> )-type chloroperoxidase ( <i>Gramella forsetii</i> )                   |
| WP_026933908.1 | M79    | family M79 unassigned peptidases ( <i>Gramella forsetii</i> )                                                    |
| WP_026933911.1 | M24X   | family M24 non-peptidase homologues ( <i>Leeuwenhoekia blandensis</i> )                                          |
| WP_026933913.1 | M01    | family M1 unassigned peptidases ( <i>Zunongwangia profunda</i> )                                                 |
| WP_026933973.1 | M16B   | subfamily M16B non-peptidase homologues ( <i>Gramella forsetii</i> )                                             |
| WP_026933974.1 | M14X   | family M14 non-peptidase homologues ( <i>Gramella forsetii</i> )                                                 |
| WP_026933979.1 | C26    | GMP synthase ( <i>Gillisia limnaea</i> )                                                                         |
| WP_026933980.1 | C40    | spr peptidase ( <i>Thermodesulfobacterium</i> sp. OPB45)                                                         |
| WP_026933984.1 | S08A   | subfamily S8A unassigned peptidases ( <i>Gramella forsetii</i> )                                                 |
| WP_026933990.1 | C26    | CTP synthetase ( <i>Zunongwangia profunda</i> )                                                                  |
| WP_026934002.1 | S09C   | dpf-6 g.p. ( <i>Caenorhabditis elegans</i> ) ( <i>Gramella forsetii</i> )                                        |
| WP_026934004.1 | S09X   | family S9 non-peptidase homologues ( <i>Gramella forsetii</i> )                                                  |
| WP_026934005.1 | S09C   | subfamily S9C unassigned peptidases                                                                              |
| WP_026934014.1 | C82    | family C82 unassigned peptidases ( <i>Chlorobium phaeobacteroides</i> )                                          |
| WP_026934037.1 | S41A   | subfamily S41A non-peptidase homologues                                                                          |
| WP_026934046.1 | S15    | family S15 unassigned peptidases ( <i>Croceibacter atlanticus</i> )                                              |

Continued on next page

Table S1: (continued)

| Accession No.  | family | Peptidase or homologue                                                                           |
|----------------|--------|--------------------------------------------------------------------------------------------------|
| WP_026934070.1 | S16    | family S16 non-peptidase homologues ( <i>Croceibacter atlanticus</i> )                           |
| WP_026934094.1 | M20A   | BT3549 putative peptidase ( <i>Zobellia galactanivorans</i> )                                    |
| WP_026934129.1 | M12A   | vertebrate tolloid-like 1 protein ( <i>Gramella forsetii</i> )                                   |
| WP_026934130.1 | M12A   | blastula protease 10 ( <i>Paracentrotus</i> ) ( <i>Gramella forsetii</i> )                       |
| WP_026934134.1 | S54    | family S54 unassigned peptidases ( <i>Gramella forsetii</i> )                                    |
| WP_026934195.1 | S10    | family S10 unassigned peptidases ( <i>Gramella forsetii</i> )                                    |
| WP_026934198.1 | M61    | family M61 unassigned peptidases ( <i>Gramella forsetii</i> )                                    |
| WP_026934208.1 | M03A   | subfamily M3A unassigned peptidases ( <i>Gramella forsetii</i> )                                 |
| WP_026934216.1 | M49    | family M49 unassigned peptidases ( <i>Pseudoalteromonas atlantica</i> )                          |
| WP_026934316.1 | C45    | family C45 unassigned peptidases ( <i>Flavobacterium johnsoniae</i> )                            |
| WP_026934334.1 | S12    | family S12 unassigned peptidases ( <i>Gramella forsetii</i> )                                    |
| WP_026934379.1 | M16B   | subfamily M16B non-peptidase homologues ( <i>Bacteroides</i> sp. CF50)                           |
| WP_026934415.1 | M19    | family M19 unassigned peptidases ( <i>Gramella forsetii</i> )                                    |
| WP_026934444.1 | C40    | family C40 unassigned peptidases ( <i>Gramella forsetii</i> )                                    |
| WP_026934459.1 | C56    | PfpI peptidase ( <i>Gramella forsetii</i> )                                                      |
| WP_026934464.1 | M14X   | family M14 non-peptidase homologues ( <i>Gramella forsetii</i> )                                 |
| WP_026934494.1 | M38    | family M38 non-peptidase homologues ( <i>Zunongwangia profunda</i> )                             |
| WP_026934520.1 | M16X   | family M16 unassigned peptidases ( <i>Imtechella halotolerans</i> )                              |
| WP_026934596.1 | S41A   | subfamily S41A unassigned peptidases ( <i>Croceibacter atlanticus</i> )                          |
| WP_026934606.1 | C26    | dihydro-orotase (N-terminal unit) ( <i>Homo sapiens</i> -type) ( <i>Ailuropoda melanoleuca</i> ) |
| WP_026934627.1 | C56    | KIAA0361 protein ( <i>Homo sapiens</i> -type) ( <i>Gramella forsetii</i> )                       |
| WP_026934634.1 | M43B   | ulilysin ( <i>Gramella forsetii</i> )                                                            |
| WP_026934639.1 | M28E   | subfamily M28E non-peptidase homologues ( <i>Gramella forsetii</i> )                             |
| WP_026934655.1 | S09X   | family S9 unassigned peptidases ( <i>Gramella forsetii</i> )                                     |
| WP_026934725.1 | S01C   | DegQ peptidase ( <i>Krokinobacter</i> sp. 4H-3-7-5)                                              |
| WP_026934743.1 | M15D   | vanX D-Ala-D-Ala dipeptidase ( <i>Gramella forsetii</i> )                                        |
| WP_026934770.1 | M28A   | subfamily M28A unassigned peptidases ( <i>Psychroflexus torquis</i> )                            |
| WP_026934811.1 | M38    | 1300019j08rik protein ( <i>Gramella forsetii</i> )                                               |
| WP_026934830.1 | M48A   | zmpste24 g.p. ( <i>Dictyostelium discoideum</i> -type) ( <i>Gramella forsetii</i> )              |
| WP_026934832.1 | M38    | family M38 non-peptidase homologues ( <i>Gramella forsetii</i> )                                 |
| WP_026934833.1 | M38    | family M38 non-peptidase homologues ( <i>Gramella forsetii</i> )                                 |
| WP_026934835.1 | M20C   | Pep581 peptidase ( <i>Gillisia</i> sp. CBA3202)                                                  |
| WP_026934849.1 | S54    | RhoII peptidase ( <i>Haloferax volcanii</i> ) and similar ( <i>Gramella forsetii</i> )           |
| WP_026934850.1 | S54    | family S54 unassigned peptidases ( <i>Gramella forsetii</i> )                                    |
| WP_026934853.1 | S26A   | subfamily S26A unassigned peptidases ( <i>Gramella forsetii</i> )                                |
| WP_026934867.1 | S33    | family S33 unassigned peptidases ( <i>Stigmatella aurantiaca</i> )                               |
| WP_026934903.1 | M38    | family M38 unassigned peptidases ( <i>Dyadobacter fermentans</i> )                               |
| WP_026934944.1 | M97    | family M97 unassigned peptidases ( <i>Pontibacter</i> sp. BAB1700)                               |
| WP_026934948.1 | S09A   | oligopeptidase B ( <i>Gramella forsetii</i> )                                                    |
| WP_026934981.1 | C26    | imidazole glycerol phosphate synthase subunit HisH ( <i>Gramella forsetii</i> )                  |

Continued on next page

Table S1: (continued)

| Accession No.  | family | Peptidase or homologue                                                              |
|----------------|--------|-------------------------------------------------------------------------------------|
| WP_026934993.1 | S09B   | subfamily S9B unassigned peptidases ( <i>Haliscomenobacter hydrossis</i> )          |
| WP_026935027.1 | S09X   | family S9 non-peptidase homologues ( <i>Spirosoma linguale</i> )                    |
| WP_026935033.1 | M38    | family M38 non-peptidase homologues ( <i>Sphingomonas wittichii</i> )               |
| WP_026935038.1 | S12    | family S12 unassigned peptidases ( <i>Chryseobacterium meningosepticum</i> )        |
| WP_026935041.1 | M01    | family M1 unassigned peptidases ( <i>Psychroflexus torquis</i> )                    |
| WP_026935046.1 | S09X   | family S9 non-peptidase homologues ( <i>Bacteroides</i> sp. 3 1 33FAA)              |
| WP_026935048.1 | S12    | family S12 unassigned peptidases ( <i>Lacinutrix</i> sp. 5H-3-7-4)                  |
| WP_026935051.1 | S09X   | family S9 non-peptidase homologues ( <i>Kordia algicida</i> )                       |
| WP_026935056.1 | S09X   | family S9 non-peptidase homologues ( <i>Cellulophaga algicola</i> )                 |
| WP_026935060.1 | S09B   | subfamily S9B unassigned peptidases ( <i>Muricauda ruestringensis</i> )             |
| WP_026935101.1 | S33    | family S33 unassigned peptidases ( <i>Gramella forsetii</i> )                       |
| WP_026935145.1 | S24    | family S24 unassigned peptidases ( <i>Zunongwangia profunda</i> )                   |
| WP_026935178.1 | S09X   | family S9 unassigned peptidases ( <i>Muricauda ruestringensis</i> )                 |
| WP_026935263.1 | S09B   | dipeptidyl-peptidase 4 (bacteria-type 2) ( <i>Lacinutrix</i> sp. 5H-3-7-4)          |
| WP_026935295.1 | M97    | family M97 unassigned peptidases ( <i>Gramella forsetii</i> )                       |
| WP_026935316.1 | S09X   | family S9 non-peptidase homologues ( <i>Gramella forsetii</i> )                     |
| WP_026935321.1 | S16    | Lon-A peptidase ( <i>Gramella forsetii</i> )                                        |
| WP_026935327.1 | M48C   | subfamily M48C unassigned peptidases ( <i>Gramella forsetii</i> )                   |
| WP_026935328.1 | S09X   | family S9 unassigned peptidases ( <i>Gramella forsetii</i> )                        |
| WP_026935339.1 | M23B   | subfamily M23B unassigned peptidases ( <i>Polaribacter</i> sp. MED152)              |
| WP_026935342.1 | M23B   | subfamily M23B unassigned peptidases ( <i>Gramella forsetii</i> )                   |
| WP_026935394.1 | M24A   | methionyl aminopeptidase 1 ( <i>Escherichia</i> -type) ( <i>Gramella forsetii</i> ) |
| WP_026935400.1 | S14    | peptidase Clp (type 1) ( <i>Gramella forsetii</i> )                                 |
| WP_026935415.1 | M57    | prtB g.p. ( <i>Myxococcus xanthus</i> ) ( <i>Gillisia limnaea</i> )                 |
| WP_026935424.1 | M56    | family M56 unassigned peptidases ( <i>Gramella forsetii</i> )                       |
| WP_026935473.1 | M23B   | subfamily M23B unassigned peptidases ( <i>Gramella forsetii</i> )                   |
| WP_026935510.1 | C44    | AsnB protein ( <i>Gramella forsetii</i> )                                           |
| WP_035715687.1 | M23B   | subfamily M23B non-peptidase homologues ( <i>Psychroflexus torquis</i> )            |
| WP_035715739.1 | M16B   | YMXG peptidase ( <i>Croceibacter atlanticus</i> )                                   |
| WP_035715761.1 | M49    | dipeptidyl-peptidase IIIB ( <i>Gramella forsetii</i> )                              |
| WP_035715858.1 | M38    | family M38 non-peptidase homologues ( <i>Kangiella koreensis</i> )                  |
| WP_035715973.1 | M75    | family M75 unassigned peptidases ( <i>Spirosoma linguale</i> )                      |
| WP_035715996.1 | M01    | family M1 unassigned peptidases ( <i>Gramella forsetii</i> )                        |
| WP_035716074.1 | S54    | family S54 unassigned peptidases ( <i>Gramella forsetii</i> )                       |
| WP_035716082.1 | M14X   | family M14 non-peptidase homologues ( <i>Gramella forsetii</i> )                    |
| WP_035716228.1 | S09X   | family S9 unassigned peptidases ( <i>Flavobacterium johnsoniae</i> )                |
| WP_035716241.1 | S33    | family S33 unassigned peptidases ( <i>Flavobacterium johnsoniae</i> )               |
| WP_035716376.1 | M16B   | subfamily M16B non-peptidase homologues ( <i>Robiginitalea biformata</i> )          |
| WP_035716379.1 | S33    | family S33 unassigned peptidases ( <i>Gramella forsetii</i> )                       |

Continued on next page

Table S1: (continued)

| Accession No.  | family | Peptidase or homologue                                                           |
|----------------|--------|----------------------------------------------------------------------------------|
| WP_035716450.1 | M79    | microcystinase MlrA ( <i>Robiginitalea biformata</i> )                           |
| WP_035716494.1 | M38    | family M38 non-peptidase homologues ( <i>Gramella forsetii</i> )                 |
| WP_035716571.1 | C40    | spr peptidase ( <i>Gramella forsetii</i> )                                       |
| WP_035716572.1 | S41A   | C-terminal processing peptidase-1 ( <i>Gramella forsetii</i> )                   |
| WP_035716608.1 | S41A   | subfamily S41A unassigned peptidases ( <i>Gramella forsetii</i> )                |
| WP_035716636.1 | M28D   | carboxypeptidase Q ( <i>Gramella forsetii</i> )                                  |
| WP_051199619.1 | C01A   | subfamily C1A unassigned peptidases ( <i>Plesiocystis pacifica</i> )             |
| WP_051199635.1 | M23B   | Mername-AA292 peptidase ( <i>Psychroflexus torquis</i> )                         |
| WP_051199679.1 | S33    | family S33 unassigned peptidases ( <i>Haliscomenobacter hydrossis</i> )          |
| WP_051199699.1 | S11    | family S11 unassigned peptidases                                                 |
| WP_051199702.1 | S13    | family S13 unassigned peptidases ( <i>Gramella forsetii</i> )                    |
| WP_051199761.1 | S09A   | prolyl endopeptidase ( <i>Myxococcus xanthus</i> ) ( <i>Chlorobium tepidum</i> ) |
| WP_051199789.1 | M56    | family M56 unassigned peptidases ( <i>Gramella forsetii</i> )                    |
| WP_051199795.1 | S12    | family S12 unassigned peptidases                                                 |
| WP_051199799.1 | M38    | family M38 non-peptidase homologues ( <i>Gramella forsetii</i> )                 |

Table S2: Simple peptidases inhibitors in the genome of *Gramella echinicola* DSM 19838<sup>T</sup>.

| Accession No.  | family | Simple peptidase inhibitors                                                           |
|----------------|--------|---------------------------------------------------------------------------------------|
| WP_026932781.1 | I39    | family I39 unassigned peptidase inhibitors ( <i>Spirosoma linguale</i> )              |
| WP_026932904.1 | I87    | family I87 unassigned peptidase inhibitors ( <i>Cucumis melo</i> )                    |
| WP_026932927.1 | I39    | family I39 unassigned peptidase inhibitors ( <i>Capnocytophaga ochracea</i> )         |
| WP_026933047.1 | I39    | family I39 unassigned peptidase inhibitor homologues ( <i>Pedobacter heparinus</i> )  |
| WP_026933083.1 | I39    | family I39 unassigned peptidase inhibitor homologues ( <i>Pedobacter heparinus</i> )  |
| WP_026933211.1 | I39    | family I39 unassigned peptidase inhibitors ( <i>Spirosoma linguale</i> )              |
| WP_026933535.1 | I39    | family I39 unassigned peptidase inhibitors ( <i>Spirosoma linguale</i> )              |
| WP_026933538.1 | I39    | family I39 unassigned peptidase inhibitor homologues ( <i>Spirosoma linguale</i> )    |
| WP_026933541.1 | I39    | family I39 unassigned peptidase inhibitors ( <i>Chitinophaga pinensis</i> )           |
| WP_026933779.1 | I39    | family I39 unassigned peptidase inhibitors ( <i>Spirosoma linguale</i> )              |
| WP_026934059.1 | I39    | family I39 unassigned peptidase inhibitors ( <i>Capnocytophaga ochracea</i> )         |
| WP_026934120.1 | I39    | family I39 unassigned peptidase inhibitor homologues ( <i>Chitinophaga pinensis</i> ) |
| WP_026934472.1 | I39    | family I39 unassigned peptidase inhibitors ( <i>Spirosoma linguale</i> )              |
| WP_026934518.1 | I39    | family I39 unassigned peptidase inhibitor homologues ( <i>Pedobacter heparinus</i> )  |
| WP_026934636.1 | I04    | family I4 unassigned peptidase inhibitors ( <i>Sulfolobus acidocaldarius</i> )        |
| WP_026934647.1 | I39    | family I39 unassigned peptidase inhibitors ( <i>Spirosoma linguale</i> )              |

Continued on next page

Table S2: (continued)

| Accession No.  | family | Simple peptidase inhibitors                                                   |
|----------------|--------|-------------------------------------------------------------------------------|
| WP_026934775.1 | I39    | family I39 unassigned peptidase inhibitor homologues (Dyadobacter fermentans) |
| WP_026935065.1 | I39    | family I39 unassigned peptidase inhibitor homologues (Spirosoma linguale)     |
| WP_026935302.1 | I39    | family I39 unassigned peptidase inhibitor homologues (Dyadobacter fermentans) |
| WP_035716629.1 | I43    | family I43 unassigned peptidase inhibitors (Pedosphaera parvula)              |
| WP_051199809.1 | I39    | family I39 unassigned peptidase inhibitors (Salinibacter ruber)               |
| WP_026932904.1 | I87    | family I87 unassigned peptidase inhibitors (Cucumis melo)                     |
| WP_026932927.1 | I39    | family I39 unassigned peptidase inhibitors (Capnocytophaga ochracea)          |
| WP_026933047.1 | I39    | family I39 unassigned peptidase inhibitor homologues (Pedobacter heparinus)   |
| WP_026933083.1 | I39    | family I39 unassigned peptidase inhibitor homologues (Pedobacter heparinus)   |
| WP_026933211.1 | I39    | family I39 unassigned peptidase inhibitors (Spirosoma linguale)               |
| WP_026933535.1 | I39    | family I39 unassigned peptidase inhibitors (Spirosoma linguale)               |
| WP_026933538.1 | I39    | family I39 unassigned peptidase inhibitor homologues (Spirosoma linguale)     |
| WP_026933541.1 | I39    | family I39 unassigned peptidase inhibitors (Chitinophaga pinensis)            |
| WP_026933779.1 | I39    | family I39 unassigned peptidase inhibitors (Spirosoma linguale)               |
| WP_026934059.1 | I39    | family I39 unassigned peptidase inhibitors (Capnocytophaga ochracea)          |
| WP_026934120.1 | I39    | family I39 unassigned peptidase inhibitor homologues (Chitinophaga pinensis)  |
| WP_026934472.1 | I39    | family I39 unassigned peptidase inhibitors (Spirosoma linguale)               |
| WP_026934518.1 | I39    | family I39 unassigned peptidase inhibitor homologues (Pedobacter heparinus)   |
| WP_026934636.1 | I04    | family I4 unassigned peptidase inhibitors (Sulfolobus acidocaldarius)         |
| WP_026934647.1 | I39    | family I39 unassigned peptidase inhibitors (Spirosoma linguale)               |
| WP_026934775.1 | I39    | family I39 unassigned peptidase inhibitor homologues (Dyadobacter fermentans) |
| WP_026935065.1 | I39    | family I39 unassigned peptidase inhibitor homologues (Spirosoma linguale)     |
| WP_026935302.1 | I39    | family I39 unassigned peptidase inhibitor homologues (Dyadobacter fermentans) |
| WP_035716629.1 | I43    | family I43 unassigned peptidase inhibitors (Pedosphaera parvula)              |
| WP_051199809.1 | I39    | family I39 unassigned peptidase inhibitors (Salinibacter ruber)               |

Table S3: Peptidases or homologues in the genome of *Gramella portivictoriae* DSM 23547<sup>T</sup>.

| Accession No.  | family | Peptidase or homologue                                                           |
|----------------|--------|----------------------------------------------------------------------------------|
| WP_026913590.1 | S12    | family S12 unassigned peptidases ( <i>Zunongwangia profunda</i> )                |
| WP_026913596.1 | U32    | family U32 unassigned peptidases ( <i>Elizabethkingia anophelis</i> )            |
| WP_026913608.1 | M23B   | subfamily M23B non-peptidase homologues ( <i>Psychroflexus torquis</i> )         |
| WP_026913639.1 | M23B   | subfamily M23B unassigned peptidases ( <i>Gramella forsetii</i> )                |
| WP_026913642.1 | M23B   | subfamily M23B non-peptidase homologues ( <i>Bacillus subtilis</i> )             |
| WP_026913664.1 | S41A   | CtpC peptidase ( <i>Kordia algicida</i> )                                        |
| WP_026913666.1 | M01    | family M1 unassigned peptidases ( <i>Gramella forsetii</i> )                     |
| WP_026913667.1 | S08A   | subfamily S8A unassigned peptidases ( <i>Zunongwangia profunda</i> )             |
| WP_026913674.1 | C40    | NlpC protein ( <i>Escherichia coli</i> ) ( <i>Cellulophaga lytica</i> )          |
| WP_026913761.1 | S09A   | prolyl oligopeptidase ( <i>Gramella forsetii</i> )                               |
| WP_026913778.1 | S09X   | family S9 unassigned peptidases ( <i>Gramella forsetii</i> )                     |
| WP_026913781.1 | U32    | family U32 unassigned peptidases ( <i>Chthonomonas calidirosea</i> )             |
| WP_026913784.1 | C44    | family C44 unassigned peptidases ( <i>Gramella forsetii</i> )                    |
| WP_026913804.1 | T02    | At3g16150 ( <i>Arabidopsis thaliana</i> ) ( <i>Gramella forsetii</i> )           |
| WP_026913837.1 | S33    | family S33 unassigned peptidases ( <i>Gramella forsetii</i> )                    |
| WP_026913846.1 | S09B   | subfamily S9B unassigned peptidases ( <i>Gramella forsetii</i> )                 |
| WP_026913847.1 | M28D   | subfamily M28D unassigned peptidases ( <i>Zunongwangia profunda</i> )            |
| WP_026913874.1 | S41A   | C-terminal processing peptidase-3 ( <i>Zunongwangia profunda</i> )               |
| WP_026913929.1 | M23B   | Mername-AA292 peptidase ( <i>Gramella forsetii</i> )                             |
| WP_026913930.1 | S16    | DNA repair protein RadA ( <i>Escherichia coli</i> ) ( <i>Gramella forsetii</i> ) |
| WP_026913937.1 | C44    | glucosamine-fructose-6-phosphate aminotransferase                                |
| WP_026913940.1 | M61    | family M61 unassigned peptidases ( <i>Gramella forsetii</i> )                    |
| WP_026913970.1 | M16B   | subfamily M16B non-peptidase homologues ( <i>Cellulophaga algicola</i> )         |
| WP_026913971.1 | M16B   | subfamily M16B non-peptidase homologues ( <i>Gramella forsetii</i> )             |
| WP_026914029.1 | M20F   | subfamily M20F unassigned peptidases ( <i>Gramella forsetii</i> )                |
| WP_026914044.1 | M56    | family M56 unassigned peptidases ( <i>Gramella forsetii</i> )                    |
| WP_026914072.1 | M38    | family M38 non-peptidase homologues ( <i>Gramella forsetii</i> )                 |
| WP_026914078.1 | S06    | family S6 unassigned peptidases ( <i>Flavobacterium johnsoniae</i> )             |
| WP_026914098.1 | T02    | isoaspartyl dipeptidase (threonine type) ( <i>Gramella forsetii</i> )            |
| WP_026914101.1 | S33    | family S33 unassigned peptidases ( <i>Ignavibacterium album</i> )                |
| WP_026914104.1 | S33    | family S33 unassigned peptidases ( <i>Pseudomonas mendocina</i> )                |
| WP_026914178.1 | S33    | family S33 non-peptidase homologues ( <i>Gramella forsetii</i> )                 |
| WP_026914183.1 | S14    | peptidase Clp (type 1) ( <i>Gramella forsetii</i> )                              |
| WP_026914190.1 | M23B   | Mername-AA292 peptidase ( <i>Gramella forsetii</i> )                             |
| WP_026914243.1 | S24    | family S24 unassigned peptidases ( <i>Zunongwangia profunda</i> )                |
| WP_026914248.1 | M38    | family M38 non-peptidase homologues ( <i>Gramella forsetii</i> )                 |
| WP_026914288.1 | S33    | family S33 unassigned peptidases ( <i>Gramella forsetii</i> )                    |
| WP_026914331.1 | S09B   | subfamily S9B unassigned peptidases ( <i>Muricauda ruestringensis</i> )          |

Continued on next page



Table S3: (continued)

| Accession No.  | family | Peptidase or homologue                                                                     |
|----------------|--------|--------------------------------------------------------------------------------------------|
| WP_026914335.1 | S09X   | family S9 non-peptidase homologues ( <i>Cellulophaga algicola</i> )                        |
| WP_026914373.1 | M24A   | methionyl aminopeptidase 1 ( <i>Escherichia</i> -type) ( <i>Gramella forsetii</i> )        |
| WP_026914377.1 | M48C   | subfamily M48C unassigned peptidases                                                       |
| WP_026914381.1 | S14    | peptidase Clp (type 5) ( <i>Gramella forsetii</i> )                                        |
| WP_026914396.1 | M57    | prtB g.p. ( <i>Myxococcus xanthus</i> ) ( <i>Gillisia limnaea</i> )                        |
| WP_026914447.1 | M23B   | subfamily M23B unassigned peptidases ( <i>Gillisia limnaea</i> )                           |
| WP_026914457.1 | C44    | family C44 unassigned peptidases ( <i>Zunongwangia profunda</i> )                          |
| WP_026914522.1 | M97    | family M97 unassigned peptidases ( <i>Gramella forsetii</i> )                              |
| WP_026914542.1 | S41A   | C-terminal processing peptidase-1 ( <i>Gramella forsetii</i> )                             |
| WP_026914546.1 | C40    | spr peptidase ( <i>Gramella forsetii</i> )                                                 |
| WP_026914551.1 | S09B   | dipeptidyl-peptidase 4 (bacteria-type 2) ( <i>Zunongwangia profunda</i> )                  |
| WP_026914690.1 | A28    | family A28 unassigned peptidases                                                           |
| WP_026914706.1 | M13    | Zmp1 peptidase ( <i>Mycobacterium</i> -type) ( <i>Gramella forsetii</i> )                  |
| WP_026914719.1 | M28X   | family M28 unassigned peptidases ( <i>Gramella forsetii</i> )                              |
| WP_026914737.1 | S33    | SCO7095-type peptidase ( <i>Gramella forsetii</i> )                                        |
| WP_026914738.1 | M24B   | subfamily M24B unassigned peptidases ( <i>Gramella forsetii</i> )                          |
| WP_026914759.1 | U69    | family U69 unassigned peptidases ( <i>Vibrio furnissii</i> )                               |
| WP_026914763.1 | M23B   | Mername-AA292 peptidase                                                                    |
| WP_026914772.1 | M14X   | family M14 non-peptidase homologues ( <i>Croceibacter atlanticus</i> )                     |
| WP_026914776.1 | A08    | signal peptidase II ( <i>Gramella forsetii</i> )                                           |
| WP_026914790.1 | M50B   | subfamily M50B unassigned peptidases ( <i>Gramella forsetii</i> )                          |
| WP_026914807.1 | S33    | family S33 unassigned peptidases ( <i>Stigmatella aurantiaca</i> )                         |
| WP_026914815.1 | M16B   | At5g56730 ( <i>Arabidopsis thaliana</i> )-like peptidase ( <i>Lacinutrix</i> sp. 5H-3-7-4) |
| WP_026914820.1 | S26A   | subfamily S26A unassigned peptidases ( <i>Gramella forsetii</i> )                          |
| WP_026914823.1 | S54    | family S54 unassigned peptidases ( <i>Gramella forsetii</i> )                              |
| WP_026914824.1 | S54    | RhoII peptidase ( <i>Haloferax volcanii</i> ) and similar ( <i>Gramella forsetii</i> )     |
| WP_026914838.1 | M20C   | Pep581 peptidase ( <i>Gramella forsetii</i> )                                              |
| WP_026914840.1 | M38    | family M38 non-peptidase homologues ( <i>Gramella forsetii</i> )                           |
| WP_026914841.1 | M38    | family M38 non-peptidase homologues ( <i>Gramella forsetii</i> )                           |
| WP_026914843.1 | M48A   | zmpste24 g.p. ( <i>Dictyostelium discoideum</i> -type) ( <i>Gramella forsetii</i> )        |
| WP_026914898.1 | S01B   | At5g27660 ( <i>Arabidopsis thaliana</i> ) ( <i>Gramella forsetii</i> )                     |
| WP_026914943.1 | M24B   | subfamily M24B unassigned peptidases ( <i>Bizionia argentinensis</i> )                     |
| WP_026914959.1 | S24    | UmuD protein ( <i>Flavobacterium johnsoniae</i> )                                          |
| WP_026914961.1 | M28A   | subfamily M28A non-peptidase homologues ( <i>Gillisia limnaea</i> )                        |
| WP_026914987.1 | M15D   | vanX D-Ala-D-Ala dipeptidase ( <i>Gramella forsetii</i> )                                  |
| WP_026915005.1 | S01C   | DegQ peptidase ( <i>Gramella forsetii</i> )                                                |
| WP_026915010.1 | S08A   | subtilisin NAT                                                                             |
| WP_026915014.1 | M14B   | subfamily M14B non-peptidase homologues ( <i>Dokdonia donghaensis</i> )                    |
| WP_026915039.1 | M23B   | subfamily M23B unassigned peptidases ( <i>Gramella forsetii</i> )                          |
| WP_026915042.1 | M23B   | subfamily M23B unassigned peptidases ( <i>Polaribacter</i> sp. MED152)                     |
| WP_026915054.1 | S09X   | family S9 unassigned peptidases ( <i>Gramella forsetii</i> )                               |
| WP_026915056.1 | M48C   | subfamily M48C unassigned peptidases ( <i>Gramella forsetii</i> )                          |
| WP_026915061.1 | S16    | Lon peptidase (type 4) ( <i>Gramella forsetii</i> )                                        |
| WP_026915067.1 | S09X   | family S9 non-peptidase homologues ( <i>Gramella forsetii</i> )                            |

Continued on next page

Table S3: (continued)

| Accession No.  | family | Peptidase or homologue                                                                         |
|----------------|--------|------------------------------------------------------------------------------------------------|
| WP_026915073.1 | S41A   | subfamily S41A unassigned peptidases ( <i>Gramella forsetii</i> )                              |
| WP_026915074.1 | S09X   | family S9 non-peptidase homologues ( <i>Spirosoma linguale</i> )                               |
| WP_026915090.1 | C44    | glutamate synthase (alpha chain) precursor ( <i>Gramella forsetii</i> )                        |
| WP_026915107.1 | M28E   | subfamily M28E unassigned peptidases ( <i>Gramella forsetii</i> )                              |
| WP_026915122.1 | M03A   | subfamily M3A unassigned peptidases ( <i>Gramella forsetii</i> )                               |
| WP_026915138.1 | S54    | family S54 unassigned peptidases ( <i>Gramella forsetii</i> )                                  |
| WP_026915170.1 | C26    | family C26 non-peptidase homologues ( <i>Gramella forsetii</i> )                               |
| WP_026915199.1 | S33    | family S33 unassigned peptidases ( <i>Gramella forsetii</i> )                                  |
| WP_026915217.1 | S66    | family S66 unassigned peptidases ( <i>Gramella forsetii</i> )                                  |
| WP_026915218.1 | S13    | family S13 unassigned peptidases ( <i>Gillisia</i> sp. CBA3202)                                |
| WP_026915221.1 | C44    | AsnB protein ( <i>Gramella forsetii</i> )                                                      |
| WP_026915235.1 | S51    | alpha-aspartyl dipeptidase (eukaryote) ( <i>Gramella forsetii</i> )                            |
| WP_026915239.1 | M01    | family M1 unassigned peptidases ( <i>Gramella forsetii</i> )                                   |
| WP_026915271.1 | M41    | Afg3-like protein 2 ( <i>Gramella forsetii</i> )                                               |
| WP_026915277.1 | M14X   | family M14 non-peptidase homologues ( <i>Polaribacter</i> sp. MED152)                          |
| WP_026915326.1 | S09C   | subfamily S9C unassigned peptidases ( <i>Teredinibacter turnerae</i> )                         |
| WP_026915348.1 | M38    | family M38 non-peptidase homologues ( <i>Spirosoma linguale</i> )                              |
| WP_026915356.1 | M14X   | family M14 non-peptidase homologues ( <i>Gramella forsetii</i> )                               |
| WP_026915364.1 | M20B   | peptidase T ( <i>Gramella forsetii</i> )                                                       |
| WP_026915369.1 | M75    | family M75 unassigned peptidases ( <i>Spirosoma linguale</i> )                                 |
| WP_026915418.1 | N11    | family N11 unassigned peptide lyases                                                           |
| WP_026915432.1 | S33    | family S33 non-peptidase homologues ( <i>Gramella forsetii</i> )                               |
| WP_026915443.1 | S09D   | glutamyl endopeptidase C ( <i>Gramella forsetii</i> )                                          |
| WP_026915453.1 | M01    | family M1 unassigned peptidases ( <i>Gramella forsetii</i> )                                   |
| WP_026915458.1 | M20D   | carboxypeptidase Ss1 ( <i>Gramella forsetii</i> )                                              |
| WP_026915463.1 | S33    | CPO-A2 ( <i>Streptomyces aureofaciens</i> )-type chloroperoxidase ( <i>Gramella forsetii</i> ) |
| WP_026915472.1 | M79    | family M79 unassigned peptidases ( <i>Gramella forsetii</i> )                                  |
| WP_026915475.1 | M24X   | family M24 non-peptidase homologues ( <i>Leeuwenhoekia blandensis</i> )                        |
| WP_026915476.1 | M01    | family M1 unassigned peptidases ( <i>Gramella forsetii</i> )                                   |
| WP_026915506.1 | M14B   | subfamily M14B non-peptidase homologues ( <i>Dyadobacter fermentans</i> )                      |
| WP_026915540.1 | M16B   | subfamily M16B non-peptidase homologues ( <i>Polaribacter</i> sp. MED152)                      |
| WP_026915541.1 | M14X   | family M14 non-peptidase homologues ( <i>Gramella forsetii</i> )                               |
| WP_026915545.1 | C26    | GMP synthase ( <i>Gramella forsetii</i> )                                                      |
| WP_026915546.1 | C40    | spr peptidase ( <i>Thermodesulfobacterium</i> sp. OPB45)                                       |
| WP_026915550.1 | S08A   | subfamily S8A unassigned peptidases ( <i>Gramella forsetii</i> )                               |
| WP_026915555.1 | C26    | CTP synthetase ( <i>Zunongwangia profunda</i> )                                                |
| WP_026915565.1 | S09C   | dpf-6 g.p. ( <i>Caenorhabditis elegans</i> ) ( <i>Gramella forsetii</i> )                      |
| WP_026915567.1 | S09X   | family S9 non-peptidase homologues ( <i>Gramella forsetii</i> )                                |
| WP_026915573.1 | C82    | family C82 unassigned peptidases ( <i>Chlorobium phaeobacteroides</i> )                        |
| WP_026915585.1 | S33    | family S33 non-peptidase homologues ( <i>Gramella forsetii</i> )                               |
| WP_026915602.1 | S09X   | family S9 unassigned peptidases ( <i>Gramella forsetii</i> )                                   |
| WP_026915624.1 | S16    | family S16 non-peptidase homologues ( <i>Zunongwangia profunda</i> )                           |
| WP_026915647.1 | M20A   | BT3549 putative peptidase ( <i>Gramella forsetii</i> )                                         |
| WP_026915684.1 | M12A   | vertebrate tolloid-like 1 protein ( <i>Gramella forsetii</i> )                                 |
| WP_026915685.1 | M12A   | blastula protease 10 ( <i>Paracentrotus</i> ) ( <i>Gramella forsetii</i> )                     |
| WP_026915689.1 | S54    | family S54 unassigned peptidases ( <i>Gramella forsetii</i> )                                  |

Continued on next page

Table S3: (continued)

| Accession No.  | family | Peptidase or homologue                                                                          |
|----------------|--------|-------------------------------------------------------------------------------------------------|
| WP_026915748.1 | S10    | family S10 unassigned peptidases ( <i>Gramella forsetii</i> )                                   |
| WP_026915750.1 | M61    | family M61 unassigned peptidases ( <i>Gramella forsetii</i> )                                   |
| WP_026915758.1 | T03    | gamma-glutamyltransferase 1 (bacterial-type) ( <i>Gramella forsetii</i> )                       |
| WP_026915761.1 | M03A   | subfamily M3A unassigned peptidases ( <i>Gramella forsetii</i> )                                |
| WP_026915768.1 | C56    | family C56 non-peptidase homologues ( <i>Gramella forsetii</i> )                                |
| WP_026915813.1 | C56    | family C56 non-peptidase homologues ( <i>Spirosoma linguale</i> )                               |
| WP_026915847.1 | M42    | family M42 unassigned peptidases ( <i>Gramella forsetii</i> )                                   |
| WP_026915869.1 | S33    | family S33 unassigned peptidases ( <i>Gramella forsetii</i> )                                   |
| WP_026915881.1 | S12    | family S12 unassigned peptidases ( <i>Psychroflexus torquis</i> )                               |
| WP_026915913.1 | M23B   | subfamily M23B non-peptidase homologues ( <i>Zunongwangia profunda</i> )                        |
| WP_026915983.1 | S09X   | family S9 unassigned peptidases ( <i>Gramella forsetii</i> )                                    |
| WP_026916002.1 | M28E   | subfamily M28E non-peptidase homologues ( <i>Gramella forsetii</i> )                            |
| WP_026916007.1 | M43B   | ulilysin ( <i>Gramella forsetii</i> )                                                           |
| WP_026916013.1 | C56    | KIAA0361 protein ( <i>Homo sapiens</i> -type) ( <i>Gramella forsetii</i> )                      |
| WP_026916028.1 | S33    | family S33 unassigned peptidases ( <i>Flavobacterium johnsoniae</i> )                           |
| WP_026916032.1 | C26    | dihydro-oroate (N-terminal unit) ( <i>Homo sapiens</i> -type) ( <i>Ailuropoda melanoleuca</i> ) |
| WP_026916037.1 | S12    | family S12 unassigned peptidases ( <i>Gramella forsetii</i> )                                   |
| WP_026916085.1 | S09X   | family S9 unassigned peptidases ( <i>Capnocytophaga ochracea</i> )                              |
| WP_026916087.1 | M38    | family M38 non-peptidase homologues ( <i>Zunongwangia profunda</i> )                            |
| WP_026916116.1 | M14X   | family M14 non-peptidase homologues ( <i>Gramella forsetii</i> )                                |
| WP_026916121.1 | C56    | PfpI peptidase ( <i>Gramella forsetii</i> )                                                     |
| WP_026916135.1 | C40    | family C40 unassigned peptidases ( <i>Gramella forsetii</i> )                                   |
| WP_026916163.1 | M19    | family M19 unassigned peptidases ( <i>Gramella forsetii</i> )                                   |
| WP_026916194.1 | M16B   | subfamily M16B non-peptidase homologues ( <i>Lacinutrix</i> sp. 5H-3-7-4)                       |
| WP_026916234.1 | S12    | family S12 unassigned peptidases ( <i>Gramella forsetii</i> )                                   |
| WP_026916252.1 | C45    | family C45 unassigned peptidases ( <i>Flavobacterium johnsoniae</i> )                           |
| WP_026916279.1 | S09X   | family S9 non-peptidase homologues ( <i>Spirosoma linguale</i> )                                |
| WP_026916283.1 | S09B   | subfamily S9B unassigned peptidases ( <i>Haliscomenobacter hydrossis</i> )                      |
| WP_026916291.1 | C26    | imidazole glycerol phosphate synthase subunit HisH ( <i>Prochlorococcus marinus</i> )           |
| WP_026916293.1 | C26    | imidazole glycerol phosphate synthase subunit HisH ( <i>Gramella forsetii</i> )                 |

Table S4: Simple peptidases inhibitors in the genome of *Gramella portivictoriae* DSM 23547<sup>T</sup>.

| Accession No.  | family | Simple peptidase inhibitors                                                            |
|----------------|--------|----------------------------------------------------------------------------------------|
| WP_026913652.1 | I87    | family I87 unassigned peptidase inhibitors ( <i>Thiorhodospira sibirica</i> )          |
| WP_026913697.1 | I39    | family I39 unassigned peptidase inhibitor homologues ( <i>Dyadobacter fermentans</i> ) |

Continued on next page

Table S4: (continued)

| Accession No.  | family | Simple peptidase inhibitors                                                      |
|----------------|--------|----------------------------------------------------------------------------------|
| WP_026913703.1 | I39    | family I39 unassigned peptidase inhibitor homologues (Capnocytophaga ochracea)   |
| WP_026913735.1 | I39    | family I39 unassigned peptidase inhibitor homologues (Pedobacter heparinus)      |
| WP_026913855.1 | I39    | family I39 unassigned peptidase inhibitors (Capnocytophaga ochracea)             |
| WP_026913967.1 | I39    | family I39 unassigned peptidase inhibitors (Chitinophaga pinensis)               |
| WP_026914327.1 | I39    | family I39 unassigned peptidase inhibitor homologues (Dyadobacter fermentans)    |
| WP_026914517.1 | I39    | family I39 unassigned peptidase inhibitors (Capnocytophaga ochracea)             |
| WP_026914780.1 | I39    | family I39 unassigned peptidase inhibitors (Spirosoma linguale)                  |
| WP_026914910.1 | I39    | family I39 unassigned peptidase inhibitors (Spirosoma linguale)                  |
| WP_026914937.1 | I39    | family I39 unassigned peptidase inhibitor homologues (Dyadobacter fermentans)    |
| WP_026915140.1 | I39    | family I39 unassigned peptidase inhibitors (Chitinophaga pinensis)               |
| WP_026915143.1 | I39    | family I39 unassigned peptidase inhibitor homologues (Dyadobacter fermentans)    |
| WP_026915301.1 | I39    | family I39 unassigned peptidase inhibitor homologues (Flavobacterium johnsoniae) |
| WP_026915614.1 | I39    | family I39 unassigned peptidase inhibitors (Chitinophaga pinensis)               |
| WP_026915991.1 | I39    | family I39 unassigned peptidase inhibitors (Spirosoma linguale)                  |
| WP_026916005.1 | I04    | family I4 unassigned peptidase inhibitors (Sulfolobus acidocaldarius)            |

Table S5: Carbohydrate active enzymes (CAZymes) in the genome of *Gramella echinicola* DSM 19838<sup>T</sup>. \*genes attributed to an enzyme class, but not to a family.

| Accession No.  | family | Annotation                                                                                                             |
|----------------|--------|------------------------------------------------------------------------------------------------------------------------|
| WP_026932676.1 | GT2    | two-component system sensor histidine kinase/response regulator (Bacteroides thetaiotaomicron VPI-5482)                |
| WP_026932677.1 | CE11   | UDP-3-O-(3-hydroxymyristoyl) N-acetylglucosamine deacetylase (Brachyspira pilosicoli 95/1000)                          |
| WP_026932743.1 | GH84   | aminopeptidase P homologue(M24 family) (Schistosoma mansoni)                                                           |
| WP_026932746.1 | GH13-8 | hypothetical protein Csp3 JD02.017 (Caenorhabditis angaria)                                                            |
| WP_026932826.1 | CBM6   | Carbohydrate binding family 6 (Emticia oligotrophica DSM 17448)                                                        |
| WP_026932838.1 | GT19   | hypothetical protein BRDCF 04625 (Bacteroides sp. CF50)                                                                |
| WP_026932848.1 | GT51   | bifunctional transglycosylase/transpeptidase penicillin-binding protein (Gramella forsetii KT0803)                     |
| WP_026932879.1 | GT9    | RfaQ-like lipopolysaccharide core biosynthesis glycosyl transferase (Gramella forsetii KT0803)                         |
| WP_026932880.1 | GT2    | conserved hypothetical protein (Azoarcus sp. BH72)                                                                     |
| WP_026932884.1 | GT4    | glycosyl transferases group 1 family protein (Janthinobacterium agaricidamnorum NBRC 102515 = DSM 9628)                |
| WP_026932885.1 | GT2    | TuaG-like glycosyl transferase (Gramella forsetii KT0803)                                                              |
| WP_026932886.1 | GH*    | nucleoside diphosphate epimerase (Celeribacter indicus)                                                                |
| WP_026932887.1 | GT2    | dTDP-4-dehydrorhamnose reductase (Pseudomonas sp. MT-1)                                                                |
| WP_026932891.1 | CBM50  | metalloendopeptidase-like membrane protein (Desulfotomaculum gibsoniae DSM 7213)                                       |
| WP_026932894.1 | CBM50  | membrane-bound lytic murein transglycosylase (Gramella forsetii KT0803)                                                |
| WP_026932919.1 | CBM5   | SptC (Natrinema sp. J7-2)                                                                                              |
| WP_026932926.1 | CE9    | N-acetylglucosamine-6-phosphate deacetylase/N-acetylmuramic acid 6-phosphate etherase (Acidiphilium multivorum AIU301) |
| WP_026932929.1 | GH*    | hypothetical protein AMK43 02675 (Leptotrichia sp. oral taxon 212)                                                     |
| WP_026932932.1 | GT2    | cell wall-associated hydrolase, invasion-associated protein (Kytococcus sedentarius DSM 20547)                         |
| WP_026932937.1 | GH89   | putative alpha-N-acetylglucosaminidase (Xanthomonas fuscans subsp. fuscans)                                            |
| WP_026932938.1 | GH3    | Beta-N-acetylhexosaminidase (Cellulophaga lytica DSM 7489)                                                             |
| WP_026932953.1 | GT51   | monofunctional biosynthetic peptidoglycan transglycosylase (Gramella forsetii KT0803)                                  |
| WP_026932955.1 | GT4    | ABC transporter related (Desulfovibrio desulfuricans subsp. desulfuricans str. ATCC 27774)                             |
| WP_026932974.1 | CBM6   | agarase, partial (Gilvimarinus polysaccharolyticus)                                                                    |
| WP_026933024.1 | CBM50  | LysM domain/BON superfamily protein (Gramella forsetii KT0803)                                                         |
| WP_026933026.1 | GH99   | mannosidase, endo-alpha, putative (Schistosoma mansoni)                                                                |
| WP_026933035.1 | GH97   | alpha-glucosidase SusB (Psychroflexus torquis ATCC 700755)                                                             |
| WP_026933050.1 | CE8    | Pectinesterase (Flavobacteriaceae bacterium 3519-10)                                                                   |
| WP_026933065.1 | GH28   | Glycoside hydrolase precursor, family 28 (Flavobacterium branchiophilum FL-15)                                         |

Continued on next page

Table S5: (continued)

| Accession No.  | family | Annotation                                                                                                                                    |
|----------------|--------|-----------------------------------------------------------------------------------------------------------------------------------------------|
| WP_026933066.1 | GH105  | unsaturated rhamnogalacturonyl hydrolase, putative, urh105A ( <i>Cellvibrio japonicus</i> Ueda107)                                            |
| WP_026933067.1 | GH105  | Rhamnogalacturonides degradation protein RhiN ( <i>Flavobacteriaceae</i> bacterium 3519-10)                                                   |
| WP_026933068.1 | GH43   | glycoside hydrolase ( <i>Pontibacter korensis</i> )                                                                                           |
| WP_026933069.1 | CE12   | GDSL family lipase ( <i>Pontibacter korensis</i> )                                                                                            |
| WP_026933071.1 | GH28   | Glycoside hydrolase family 28 ( <i>Flavobacterium johnsoniae</i> UW101)                                                                       |
| WP_026933072.1 | GH35   | mannonate dehydratase ( <i>Chitinophaga pinensis</i> DSM 2588)                                                                                |
| WP_026933085.1 | GH16   | beta-glucanase ( <i>Glaciecola nitratreducens</i> FR1064)                                                                                     |
| WP_026933086.1 | GH16   | beta-glucanase precursor ( <i>Maribacter</i> sp. HTCC2170)                                                                                    |
| WP_026933087.1 | GH16   | Endo-1,4-beta-xylanase A precursor ( <i>Altererythrobacter epoxidivorans</i> )                                                                |
| WP_026933088.1 | GH3    | beta-glucosidase ( <i>Gramella forsetii</i> KT0803)                                                                                           |
| WP_026933089.1 | GH16   | glycosyl hydrolase, family 16 ( <i>Gramella forsetii</i> KT0803)                                                                              |
| WP_026933091.1 | GH13   | alpha amylase catalytic region ( <i>Eubacterium limosum</i> KIST612)                                                                          |
| WP_026933108.1 | PL1-5  | pectin methylsterase ( <i>Alteromonas australica</i> )                                                                                        |
| WP_026933110.1 | GT2    | two-component system sensor histidine kinase/response regulator, hybrid(one component system) ( <i>Bacteroides thetaiotaomicron</i> VPI-5482) |
| WP_026933112.1 | GH130  | glycosidase related protein ( <i>Pseudopedobacter saltans</i> DSM 12145)                                                                      |
| WP_026933123.1 | AA2    | peroxidase ( <i>Salmonella enterica</i> subsp. <i>enterica</i> serovar Typhi)                                                                 |
| WP_026933134.1 | CE14   | LmbE family protein ( <i>Sphingobacterium</i> sp. PM2-P1-29)                                                                                  |
| WP_026933135.1 | GT2    | glycosyl transferase ( <i>Chamaesiphon minutus</i> PCC 6605)                                                                                  |
| WP_026933139.1 | GT2    | riboflavin biosynthesis protein RibF ( <i>Haliscomenobacter hydrossis</i> DSM 1100)                                                           |
| WP_026933141.1 | GH95   | hypothetical protein AN3106.2 ( <i>Aspergillus nidulans</i> FGSC A4)                                                                          |
| WP_026933171.1 | CBM50  | peptidase ( <i>Brevibacillus laterosporus</i> )                                                                                               |
| WP_026933177.1 | GT5    | glycogen synthase N-terminal domain-like protein ( <i>Gramella forsetii</i> KT0803)                                                           |
| WP_026933207.1 | GH16   | putative A/G-specific adenine glycosylase ( <i>Bifidobacterium bifidum</i> ATCC 29521 = JCM 1255 = DSM 20456)                                 |
| WP_026933233.1 | GT2    | glycosyl transferase family 2 ( <i>Chlorobium limicola</i> DSM 245)                                                                           |
| WP_026933236.1 | GH15   | glycoside hydrolase 15-related ( <i>Chlorobaculum parvum</i> NCIB 8327)                                                                       |
| WP_026933237.1 | GT2    | glycosyl transferase, family 2 ( <i>Gramella forsetii</i> KT0803)                                                                             |
| WP_026933238.1 | GH113  | conserved hypothetical protein, secreted ( <i>Gramella forsetii</i> KT0803)                                                                   |
| WP_026933241.1 | GT2    | RfbJ-like lipopolysaccharide biosynthesis glycosyl transferase ( <i>Gramella forsetii</i> KT0803)                                             |
| WP_026933256.1 | GH92   | alpha-1,2-mannosidase, putative ( <i>Prevotella dentalis</i> DSM 3688)                                                                        |
| WP_026933278.1 | CE*    | Probable esterase precursor ( <i>Flavobacterium branchiophilum</i> FL-15)                                                                     |
| WP_026933300.1 | GT32   | glycosyltransferase sugar-binding region containing DXD motif ( <i>Beijerinckia indica</i> subsp. <i>indica</i> ATCC 9039)                    |
| WP_026933301.1 | GH43   | fibronectin type III repeat domain containing secreted glycoside hydrolase, family 43 ( <i>Gramella forsetii</i> KT0803)                      |
| WP_026933307.1 | CBM12  | dioxygenase ( <i>Streptomyces collinus</i> Tu 365)                                                                                            |

Continued on next page

Table S5: (continued)

| Accession No.  | family | Annotation                                                                                                                            |
|----------------|--------|---------------------------------------------------------------------------------------------------------------------------------------|
| WP_026933364.1 | GT2    | dolichol-phosphate mannosyltransferase family protein (Gramella forsetii KT0803)                                                      |
| WP_026933373.1 | GT2    | two-component system sensor histidine kinase/response regulator, hybrid(one component system) (Bacteroides thetaiotaomicron VPI-5482) |
| WP_026933374.1 | GT*    | hypothetical protein CA2559 01800 (Croceibacter atlanticus HTCC2559)                                                                  |
| WP_026933375.1 | GT30   | 3-deoxy-D-manno-octulosonic-acid transferase (Fusobacterium nucleatum subsp. polymorphum)                                             |
| WP_026933403.1 | CE4    | protein containing polysaccharide deacetylase domain (Gramella forsetii KT0803)                                                       |
| WP_026933408.1 | PL4-3  | hypothetical protein AN4139.2 (Aspergillus nidulans FGSC A4)                                                                          |
| WP_026933443.1 | GT4    | ABC transporter related (Desulfovibrio desulfuricans subsp. desulfuricans str. ATCC 27774)                                            |
| WP_026933476.1 | CBM50  | peptigoglycan-binding protein LysM (Treponema sp. OMZ 838)                                                                            |
| WP_026933485.1 | CBM50  | mannosyl-glycoprotein endo-beta-N-acetylglucosamidase family protein (Gramella forsetii KT0803)                                       |
| WP_026933486.1 | GT2    | amino acid adenylation enzyme/thioester reductase family protein (Chamaesiphon minutus PCC 6605)                                      |
| WP_026933505.1 | GT4    | Mannose-1-phosphate guanylyltransferase(GDP)(plasmid) (Burkholderia phymatum STM815)                                                  |
| WP_026933507.1 | GT4    | ABC transporter related (Desulfovibrio desulfuricans subsp. desulfuricans str. ATCC 27774)                                            |
| WP_026933510.1 | GT2    | glycosyl transferase family 2 (Siansivirga zeaxanthinifaciens CC-SAMT-1)                                                              |
| WP_026933569.1 | GT5    | glycogen synthase (Gramella forsetii KT0803)                                                                                          |
| WP_026933571.1 | GH*    | putative secreted protein (Chitinophaga pinensis DSM 2588)                                                                            |
| WP_026933574.1 | CBM16  | hypothetical protein PBOR 19105 (Paenibacillus borealis)                                                                              |
| WP_026933605.1 | GT28   | cell division protein FtsW (Kribbella flavida DSM 17836)                                                                              |
| WP_026933606.1 | GT28   | undecaprenyldiphospho-muramoylpentapeptide beta-N-acetylglucosaminyltransferase (Gramella forsetii KT0803)                            |
| WP_026933607.1 | GT28   | UDP-N-acetylmuramate/alanine ligase (Cellulomonas flavigena DSM 20109)                                                                |
| WP_026933618.1 | GH3    | glycoside hydrolase family 3 domain protein (Sulfurimonas autotrophica DSM 16294)                                                     |
| WP_026933621.1 | GT4    | asparagine synthase(glutamine-hydrolyzing) (Pseudonocardia dioxanivorans CB1190)                                                      |
| WP_026933629.1 | GT2    | cysteinyl-tRNA synthetase (Thermobaculum terrenum ATCC BAA-798)                                                                       |
| WP_026933660.1 | GT30   | tetraacyldisaccharide 4'-kinase (Acidaminococcus fermentans DSM 20731)                                                                |
| WP_026933661.1 | GT2    | two-component system sensor histidine kinase/response regulator, hybrid(one component system) (Bacteroides thetaiotaomicron VPI-5482) |
| WP_026933665.1 | GT2    | transmembrane family-2 glycosyl transferase (Gramella forsetii KT0803)                                                                |
| WP_026933672.1 | GH18   | chitinase I, partial (Pantoea dispersa)                                                                                               |
| WP_026933684.1 | AA12   | Putative L-sorbose dehydrogenase(sndh) protein (Sinorhizobium meliloti 1021)                                                          |
| WP_026933706.1 | CE11   | DDX20 HUMAN Probable ATP-dependent RNA helicase DDX20(ISS) (Ostreococcus tauri)                                                       |

Continued on next page

Table S5: (continued)

| Accession No.  | family  | Annotation                                                                                                                   |
|----------------|---------|------------------------------------------------------------------------------------------------------------------------------|
| WP_026933716.1 | CE11    | UDP-3-O-(3-hydroxymyristoyl) N-acetylglucosamine deacetylase ( <i>Desulfomonile tiedjei</i> DSM 6799)                        |
| WP_026933723.1 | GT2     | glycosyl transferase, family 2 ( <i>Zunongwangia profunda</i> SM-A87)                                                        |
| WP_026933727.1 | GT4     | glycosyltransferase ( <i>Zunongwangia profunda</i> SM-A87)                                                                   |
| WP_026933733.1 | GT4     | mannose-1-phosphate guanylyltransferase ( <i>Escherichia coli</i> )                                                          |
| WP_026933748.1 | CBM32   | hypothetical protein R50912 26740 ( <i>Paenibacillus</i> sp. FSL R5-0912)                                                    |
| WP_026933765.1 | GT66    | dolichyl-diphosphooligosaccharide-protein glycotransferase ( <i>Candidatus Nitrososphaera gargensis</i> Ga9.2)               |
| WP_026933767.1 | GH18    | putative bifunctional protein:peroxiredoxin/chitinase (( <i>Clostridium</i> ) <i>sordellii</i> )                             |
| WP_026933772.1 | GT4     | ABC transporter related ( <i>Desulfovibrio desulfuricans</i> subsp. <i>desulfuricans</i> str. ATCC 27774)                    |
| WP_026933808.1 | GH3     | O-glycosyl hydrolase family protein(homolog to N-acetylglucosaminidase) ( <i>Halobacillus halophilus</i> DSM 2266)           |
| WP_026933823.1 | CBM13   | elongation factor Tu ( <i>Streptomyces albulus</i> )                                                                         |
| WP_026933895.1 | GH2     | hypothetical protein AN2824.2 ( <i>Aspergillus nidulans</i> FGSC A4)                                                         |
| WP_026933902.1 | GT2     | WbbL-like lipopolysaccharide biosynthesis glycosyl transferase ( <i>Gramella forsetii</i> KT0803)                            |
| WP_026933910.1 | GT51    | peptidoglycan transglycosylase ( <i>Halorhodospira halochloris</i> str. A)                                                   |
| WP_026933918.1 | GT2     | ABC transporter-like protein ( <i>Streptomyces</i> sp. 769)                                                                  |
| WP_026933926.1 | GT2     | ABC transporter-like protein ( <i>Streptomyces</i> sp. 769)                                                                  |
| WP_026933936.1 | GT4     | putative transferase ( <i>Streptomyces griseus</i> subsp. <i>griseus</i> NBRC 13350)                                         |
| WP_026933937.1 | GT2     | CDP-glycerol:glycerophosphate glycerophosphotransferase ( <i>Cellulophaga lytica</i> )                                       |
| WP_026933953.1 | GH13-11 | glycogen debranching protein ( <i>Salmonella enterica</i> subsp. <i>enterica</i> serovar <i>Enteritidis</i> str. EC20121179) |
| WP_026933980.1 | CBM50   | secreted protein containing LysM domains ( <i>Gramella forsetii</i> KT0803)                                                  |
| WP_026934004.1 | CE*     | conserved hypothetical protein, secreted ( <i>Gramella forsetii</i> KT0803)                                                  |
| WP_026934048.1 | GH43    | aldose 1-epimerase ( <i>Prevotella denticola</i> F0289)                                                                      |
| WP_026934054.1 | GH*     | hypothetical protein GFO 2143 ( <i>Gramella forsetii</i> KT0803)                                                             |
| WP_026934062.1 | GH65    | HAD family hydrolase ( <i>Anabaena</i> sp. wa102)                                                                            |
| WP_026934063.1 | GH65    | glycoside hydrolase, family 65 ( <i>Gramella forsetii</i> KT0803)                                                            |
| WP_026934064.1 | GH13    | alpha amylase ( <i>Gramella forsetii</i> KT0803)                                                                             |
| WP_026934065.1 | GH13    | alpha amylase ( <i>Gramella forsetii</i> KT0803)                                                                             |
| WP_026934110.1 | GH19    | Chaperone protein DnaK ( <i>Janthinobacterium</i> sp. CG23 2)                                                                |
| WP_026934129.1 | CBM13   | flavastacin ( <i>Corallocooccus coralloides</i> DSM 2259)                                                                    |
| WP_026934130.1 | CBM13   | flavastacin ( <i>Corallocooccus coralloides</i> DSM 2259)                                                                    |
| WP_026934162.1 | GT2     | Glycosyl transferase, group 2 family protein ( <i>Flavobacterium branchiophilum</i> FL-15)                                   |
| WP_026934163.1 | GT4     | capsular polysaccharide biosynthesis glycosyl transferase ( <i>Flammeovirgaceae</i> bacterium 311)                           |
| WP_026934164.1 | CE4     | Predicted xylanase/chitin deacetylase ( <i>Clostridium novyi</i> NT)                                                         |
| WP_026934167.1 | GT4     | glycosyl transferase, group 1 ( <i>Gramella forsetii</i> KT0803)                                                             |
| WP_026934170.1 | GT2     | glycosyl transferase ( <i>Echinicola vietnamensis</i> DSM 17526)                                                             |
| WP_026934171.1 | GT4     | glycosyltransferase ( <i>Belliella baltica</i> DSM 15883)                                                                    |

Continued on next page



Table S5: (continued)

| Accession No.  | family  | Annotation                                                                                                                   |
|----------------|---------|------------------------------------------------------------------------------------------------------------------------------|
| WP_026934172.1 | GT2     | glycosyl transferase family 2 ( <i>Marivirga tractuosa</i> DSM 4126)                                                         |
| WP_026934177.1 | GT4     | capsular polysaccharide biosynthesis glycosyl transferase ( <i>Gramella forsetii</i> KT0803)                                 |
| WP_026934178.1 | GT4     | Undecaprenyl-phosphate galactose phosphotransferase ( <i>Paenibacillus</i> sp. JDR-2)                                        |
| WP_026934204.1 | GT5     | phytochrome b, partial ( <i>Mnesithea selloana</i> )                                                                         |
| WP_026934211.1 | GT4     | ABC transporter related ( <i>Desulfovibrio desulfuricans</i> subsp. <i>desulfuricans</i> str. ATCC 27774)                    |
| WP_026934220.1 | GT2     | hyaluronan synthase ( <i>Gramella forsetii</i> KT0803)                                                                       |
| WP_026934237.1 | GT28    | conserved hypothetical protein ( <i>Methylobacterium extorquens</i> CM4)                                                     |
| WP_026934238.1 | GT4     | hypothetical protein AOC03 12205(plasmid) ( <i>Psychrobacter urativorans</i> )                                               |
| WP_026934239.1 | GH17    | glycosyltransferase ( <i>Azospirillum</i> sp. B510)                                                                          |
| WP_026934287.1 | GT83    | ArnT-like undecaprenyl-phosphate alpha-4-amino-4-deoxy-L-arabinose arabinosyl transferase ( <i>Gramella forsetii</i> KT0803) |
| WP_026934288.1 | GH1     | mannose-6-phosphate isomerase, class I/beta-galactosidase ( <i>Roseburia intestinalis</i> M50/1)                             |
| WP_026934314.1 | GT2     | transmembrane family-2 glycosyl transferase ( <i>Gramella forsetii</i> KT0803)                                               |
| WP_026934317.1 | GT2     | capsular polysaccharide biosynthesis protein ( <i>Sorangium cellulosum</i> So ce56)                                          |
| WP_026934329.1 | GH25    | hypothetical protein SALIVB 1060 ( <i>Streptococcus salivarius</i> CCHSS3)                                                   |
| WP_026934334.1 | GH3     | glycoside hydrolase ( <i>Nonlabens dokdonensis</i> DSW-6)                                                                    |
| WP_026934335.1 | GT4     | glycosyl transferase, group 1 ( <i>Gramella forsetii</i> KT0803)                                                             |
| WP_026934341.1 | GT49    | predicted protein ( <i>Phaeodactylum tricornutum</i> CCAP 1055/1)                                                            |
| WP_026934348.1 | GH31    | hypothetical protein AN8217.2 ( <i>Aspergillus nidulans</i> FGSC A4)                                                         |
| WP_026934403.1 | GT4     | glycosyl transferase, group 1 ( <i>Gramella forsetii</i> KT0803)                                                             |
| WP_026934416.1 | GT51    | bifunctional transglycosylase/transpeptidase penicillin-binding protein ( <i>Zunongwangia profunda</i> SM-A87)               |
| WP_026934430.1 | GT2     | UDP-glucose 4-epimerase(plasmid) ( <i>Cyanothece</i> sp. PCC 7822)                                                           |
| WP_026934444.1 | GT2     | cell wall-associated hydrolase, invasion-associated protein ( <i>Kytococcus sedentarius</i> DSM 20547)                       |
| WP_026934446.1 | GT51    | penicillin-binding protein, partial (uncultured <i>Parcubacteria bacterium</i> Rifle 16ft 4 minimus 37658)                   |
| WP_026934471.1 | GH72    | Rab1 family GTPase(PiYpt1) putative ( <i>Albugo laibachii</i> Nc14)                                                          |
| WP_026934473.1 | GH13-16 | trehalose synthase ( <i>Robiginitalea biformata</i> HTCC2501)                                                                |
| WP_026934488.1 | CBM*    | hypothetical protein GFO 1460 ( <i>Gramella forsetii</i> KT0803)                                                             |
| WP_026934489.1 | GT4     | ABC transporter related ( <i>Desulfovibrio desulfuricans</i> subsp. <i>desulfuricans</i> str. ATCC 27774)                    |
| WP_026934566.1 | AA1     | copper oxidase ( <i>Mycobacterium abscessus</i> UC22)                                                                        |
| WP_026934583.1 | GT4     | nicotinate-nucleotide pyrophosphorylase(carboxylating) ( <i>Flexibacter litoralis</i> DSM 6794)                              |
| WP_026934586.1 | CE11    | DDX20 HUMAN Probable ATP-dependent RNA helicase DDX20(ISS) ( <i>Ostreococcus tauri</i> )                                     |
| WP_026934617.1 | GT2     | undecaprenyl-phosphate 4-deoxy-4-formamido-L-arabinose transferase ( <i>Gramella forsetii</i> KT0803)                        |

Continued on next page

Table S5: (continued)

| Accession No.  | family | Annotation                                                                                                       |
|----------------|--------|------------------------------------------------------------------------------------------------------------------|
| WP_026934636.1 | GH15   | glycosyl hydrolase, family 15 (Gramella forsetii KT0803)                                                         |
| WP_026934637.1 | GT20   | trehalose 6-phosphate synthase/phosphatase (Gramella forsetii KT0803)                                            |
| WP_026934668.1 | GT66   | dolichyl-diphosphooligosaccharide-protein glycotransferase (Candidatus Nitrososphaera gargensis Ga9.2)           |
| WP_026934685.1 | GT4    | thioredoxin reductase (Inonotus obliquus)                                                                        |
| WP_026934744.1 | CBM50  | trifunctional nucleotide phosphoesterase protein YfkN (Sinorhizobium fredii USDA 257)                            |
| WP_026934754.1 | GT2    | membrane glycosyl transferase, family 2 (Gramella forsetii KT0803)                                               |
| WP_026934771.1 | GH29   | Alpha-L-fucosidase, family GH29 / Acetylerase (Zobellia galactanivorans)                                         |
| WP_026934774.1 | GH32   | glycosyl hydrolase, family 32 (Gramella forsetii KT0803)                                                         |
| WP_026934783.1 | GT2    | predicted sensory transduction regulatory protein (Methanothermobacter marburgensis str. Marburg)                |
| WP_026934802.1 | GT51   | Multimodular transpeptidase-transglycosylase (Castellaniella defragrans 65Phen)                                  |
| WP_026934815.1 | CE14   | conserved hypothetical protein (Gramella forsetii KT0803)                                                        |
| WP_026934827.1 | GT47   | hypothetical protein VITISV 016911 (Vitis vinifera)                                                              |
| WP_026934833.1 | CE*    | amidohydrolase (Caulobacter segnis ATCC 21756)                                                                   |
| WP_026934836.1 | GT66   | peptidyl-prolyl cis-trans isomerase(rotamase) - cyclophilin family (Candidatus Nitrososphaera evergladensis SR1) |
| WP_026934864.1 | CBM13  | hypothetical protein MFUL124B02 36260 (Myxococcus fulvus 124B02)                                                 |
| WP_026934869.1 | GT2    | transcriptional regulator (Cellulophaga lytica)                                                                  |
| WP_026934873.1 | CBM50  | 5'-Nucleotidase domain protein (Paenibacillus sp. JDR-2)                                                         |
| WP_026934879.1 | GT2    | sulfatase (Leadbetterella byssophila DSM 17132)                                                                  |
| WP_026934884.1 | GT2    | transmembrane family-2 glycosyl transferase-possibly involved in biofilm formation (Gramella forsetii KT0803)    |
| WP_026934917.1 | GH16   | glycosyl hydrolase, family 16 (Gramella forsetii KT0803)                                                         |
| WP_026934930.1 | CE14   | hypothetical protein GFO 1816 (Gramella forsetii KT0803)                                                         |
| WP_026934954.1 | GT4    | glycosyl transferase, group 1 (Gramella forsetii KT0803)                                                         |
| WP_026934967.1 | CE11   | LpxC/FabZ bifunctional enzyme (Gramella forsetii KT0803)                                                         |
| WP_026934993.1 | GH43   | Dipeptidyl aminopeptidase/acylaminoacyl-peptidase (Xanthomonas citri subsp. citri UI6)                           |
| WP_026935002.1 | GT2    | undecaprenyl-phosphate 4-deoxy-4-formamido-L-arabinose transferase-like protein (Gramella forsetii KT0803)       |
| WP_026935031.1 | GH*    | AraC family transcriptional regulator (Clostridium sporogenes)                                                   |
| WP_026935038.1 | GH3    | glycoside hydrolase family 3 domain protein (Leadbetterella byssophila DSM 17132)                                |
| WP_026935046.1 | CE1    | hypothetical protein plpp0079(plasmid) (Legionella pneumophila str. Paris)                                       |
| WP_026935058.1 | GH2    | glycoside hydrolase, family 2 (Gramella forsetii KT0803)                                                         |
| WP_026935060.1 | CE*    | secreted alpha/beta fold hydrolase-possibly a phospholipase/carboxylesterase (Gramella forsetii KT0803)          |
| WP_026935067.1 | GH3    | unnamed protein product (Aspergillus oryzae RIB40)                                                               |
| WP_026935085.1 | GT2    | ABC transporter-like protein (Streptomyces sp. 769)                                                              |
| WP_026935105.1 | GT9    | glycosyl transferase, family 9 (Burkholderia glumae PG1)                                                         |
| WP_026935134.1 | CBM48  | hypothetical protein GFO 0282 (Gramella forsetii KT0803)                                                         |
| WP_026935142.1 | GT30   | 3-deoxy-D-manno-octulosonic-acid transferase (Gramella forsetii KT0803)                                          |

Continued on next page

Table S5: (continued)

| Accession No.  | family  | Annotation                                                                                                            |
|----------------|---------|-----------------------------------------------------------------------------------------------------------------------|
| WP_026935173.1 | GT2     | ABC transporter-like protein ( <i>Streptomyces</i> sp. 769)                                                           |
| WP_026935187.1 | GT2     | glycosyl transferase ( <i>Zunongwangia profunda</i> SM-A87)                                                           |
| WP_026935188.1 | GT2     | putative intercellular adhesion protein A ( <i>Azorhizobium caulinodans</i> ORS 571)                                  |
| WP_026935225.1 | GT2     | response regulator receiver modulated diguanylate cyclase ( <i>Geodermatophilus obscurus</i> DSM 43160)               |
| WP_026935241.1 | GH31    | Alpha-glucosidase, family 31 of glycosyl hydrolase ( <i>Maribacter</i> sp. HTCC2170)                                  |
| WP_026935242.1 | GH13-9  | 1,4-alpha-glucan branching enzyme ( <i>Gramella forsetii</i> KT0803)                                                  |
| WP_026935243.1 | GH13-16 | trehalose synthase ( <i>Flammeovirgaceae</i> bacterium 311)                                                           |
| WP_026935244.1 | GH13-3  | alpha-amylase ( <i>Winogradskyella</i> sp. PG-2)                                                                      |
| WP_026935268.1 | GT19    | lipid-A-disaccharide synthase ( <i>Gramella forsetii</i> KT0803)                                                      |
| WP_026935272.1 | GT28    | cell division protein FtsW ( <i>Kribbella flavida</i> DSM 17836)                                                      |
| WP_026935308.1 | CBM13   | hypothetical protein N008 02650 ( <i>Hymenobacter</i> sp. APR13)                                                      |
| WP_026935362.1 | CBM48   | glycoside hydrolase family 13 domain protein ( <i>Desulfatibacillum alkenivorans</i> AK-01)                           |
| WP_026935392.1 | GT4     | putative glycosyltransferase ( <i>Desulfovibrio magneticus</i> RS-1)                                                  |
| WP_026935398.1 | GH108   | hypothetical protein Z042 16435 ( <i>Serratia fonticola</i> RB-25)                                                    |
| WP_026935415.1 | CBM13   | alpha-L-arabinofuranosidase ( <i>Corallocooccus coralloides</i> DSM 2259)                                             |
| WP_026935430.1 | GT8     | Glycosyl transferase, family 8-glycogenin ( <i>Xanthophyllomyces dendrorhous</i> )                                    |
| WP_026935460.1 | CE11    | UDP-3-O-(3-hydroxymyristoyl) N-acetylglucosamine deacetylase ( <i>Desulfomonile tiedjei</i> DSM 6799)                 |
| WP_026935484.1 | GT4     | ABC transporter related ( <i>Desulfovibrio desulfuricans</i> subsp. <i>desulfuricans</i> str. ATCC 27774)             |
| WP_026935487.1 | CBM50   | teichoic acid ABC transporter ATP-binding protein ( <i>Lactococcus lactis</i> subsp. <i>lactis</i> )                  |
| WP_026935497.1 | GT2     | colanic acid biosynthesis glycosyl transferase ( <i>Gramella forsetii</i> KT0803)                                     |
| WP_026935501.1 | GT2     | glycosyl transferase family 2 ( <i>Melioribacter roseus</i> P3M-2)                                                    |
| WP_026935503.1 | GT10    | glycosyl transferase ( <i>Gramella forsetii</i> KT0803)                                                               |
| WP_026935505.1 | GT*     | glycosyl transferase, family 2 ( <i>Gramella forsetii</i> KT0803)                                                     |
| WP_026935509.1 | GT*     | conserved hypothetical protein, cytidylyltransferase family (uncultured archaeon)                                     |
| WP_026935510.1 | GT4     | asparagine synthase(glutamine-hydrolyzing) ( <i>Pseudonocardia dioxanivorans</i> CB1190)                              |
| WP_026935512.1 | GT4     | glycosyl transferase, group 1 ( <i>Gramella forsetii</i> KT0803)                                                      |
| WP_026935513.1 | GT2     | glycosyl transferase, family 2 ( <i>Gramella forsetii</i> KT0803)                                                     |
| WP_026935514.1 | GT2     | glycosyl transferase, family 2 ( <i>Gramella forsetii</i> KT0803)                                                     |
| WP_026935515.1 | GT64    | hypothetical protein ( <i>Zea mays</i> )                                                                              |
| WP_026935517.1 | GT4     | glycosyl transferase, group 1 ( <i>Gramella forsetii</i> KT0803)                                                      |
| WP_026935520.1 | GT4     | glycosyl transferases group 1 ( <i>Gramella forsetii</i> KT0803)                                                      |
| WP_026935521.1 | GT4     | glycosyl transferases group 1 ( <i>Gramella forsetii</i> KT0803)                                                      |
| WP_026935522.1 | GT2     | putative glycosyltransferase ( <i>Moritella viscosa</i> )                                                             |
| WP_026935543.1 | GH28    | hypothetical protein VITISV 002009 ( <i>Vitis vinifera</i> )                                                          |
| WP_035715612.1 | CBM6    | Carbohydrate binding family 6 ( <i>Niastella koreensis</i> GR20-10)                                                   |
| WP_035715653.1 | GT2     | hypothetical protein SYNPCCN 0346 ( <i>Synechocystis</i> sp. PCC 6803 substr. PCC-N)                                  |
| WP_035715744.1 | GT2     | transmembrane family-2 glycosyl transferase-possibly involved in biofilm formation ( <i>Gramella forsetii</i> KT0803) |

Continued on next page

Table S5: (continued)

| Accession No.  | family    | Annotation                                                                                                                                    |
|----------------|-----------|-----------------------------------------------------------------------------------------------------------------------------------------------|
| WP_035715765.1 | GT2       | transmembrane family-2 glycosyl transferase-possibly involved in biofilm formation ( <i>Gramella forsetii</i> KT0803)                         |
| WP_035715773.1 | CBM*      | hypothetical protein GFO 0138 ( <i>Gramella forsetii</i> KT0803)                                                                              |
| WP_035715963.1 | GH5-42    | glycosidase ( <i>Zunongwangia profunda</i> SM-A87)                                                                                            |
| WP_035716021.1 | GH13      | alpha-amylase ( <i>Cellulophaga baltica</i> 18)                                                                                               |
| WP_035716058.1 | GH23      | putative soluble lytic transglycosylase fused to an ABC-type amino acid-binding protein ( <i>Owenweeksia hongkongensis</i> DSM 17368)         |
| WP_035716203.1 | CE4       | membrane protein containing polysaccharide deacetylase domain ( <i>Gramella forsetii</i> KT0803)                                              |
| WP_035716456.1 | CBM20     | helix-turn-helix domain-containing protein AraC type ( <i>Emticicia oligotrophica</i> DSM 17448)                                              |
| WP_035716516.1 | GH3       | Beta-glucosidase ( <i>Cellulophaga algicola</i> DSM 14237)                                                                                    |
| WP_035716571.1 | CBM50     | Putative peptidoglycan binding domain protein ( <i>Flavobacterium psychrophilum</i> )                                                         |
| WP_035716629.1 | GH8, CBM9 | candidate b-glycosidase, CBM9 module, Glycoside Hydrolase Family 8 protein ( <i>Cytophaga hutchinsonii</i> ATCC 33406)                        |
| WP_035716644.1 | CBM50     | Teichoic acid ABC transporter ( <i>Lactococcus lactis</i> subsp. <i>lactis</i> NCDO 2118)                                                     |
| WP_051199619.1 | CBM13     | secreted protein ( <i>Achlya hypogyna</i> )                                                                                                   |
| WP_051199624.1 | CBM57     | Fibronectin type III domain protein ( <i>Cyclobacterium marinum</i> DSM 745)                                                                  |
| WP_051199635.1 | CBM50     | peptidase M23 ( <i>Pseudomonas syringae</i> pv. <i>actinidiae</i> ICMP 18884)                                                                 |
| WP_051199650.1 | GH20      | hypothetical protein WQ53 10285 ( <i>Pseudoxanthomonas suwonensis</i> )                                                                       |
| WP_051199652.1 | GH3       | O-glycosyl hydrolase family protein(homolog to N-acetylglucosaminidase) ( <i>Halobacillus halophilus</i> DSM 2266)                            |
| WP_051199662.1 | PL9-1     | hypothetical Protein YC6258 05515 ( <i>Gynuella sunshinyii</i> YC6258)                                                                        |
| WP_051199664.1 | PL9-1     | hypothetical Protein YC6258 05515 ( <i>Gynuella sunshinyii</i> YC6258)                                                                        |
| WP_051199666.1 | GH*       | hypothetical protein Deipr 2087(plasmid) ( <i>Deinococcus proteolyticus</i> MRP)                                                              |
| WP_051199683.1 | CBM57     | putative secreted protein ( <i>Maribacter</i> sp. HTCC2170)                                                                                   |
| WP_051199688.1 | CE8       | pectin esterase ( <i>Pontibacter korlensis</i> )                                                                                              |
| WP_051199697.1 | GH26      | putative glycosyltransferase(GT2) ( <i>Formosa agariphila</i> KMM 3901)                                                                       |
| WP_051199730.1 | GT4       | glycosyl transferase, group 1 ( <i>Gramella forsetii</i> KT0803)                                                                              |
| WP_051199731.1 | GT9       | LPS heptosyltransferase II ( <i>Winogradskyella</i> sp. PG-2)                                                                                 |
| WP_051199735.1 | GH74      | hypothetical protein VC82 851 ( <i>Muricauda lutaonensis</i> )                                                                                |
| WP_051199736.1 | GH74      | hypothetical protein VC82 851 ( <i>Muricauda lutaonensis</i> )                                                                                |
| WP_051199737.1 | GH74      | hypothetical protein VC82 851 ( <i>Muricauda lutaonensis</i> )                                                                                |
| WP_051199738.1 | GT10      | alpha-1,3-fucosyltransferase ( <i>Coraliomargarita akajimensis</i> DSM 45221)                                                                 |
| WP_051199739.1 | GT2       | putative glycosyl transferase family 2 protein ( <i>Pyrococcus</i> sp. ST04)                                                                  |
| WP_051199744.1 | GT2       | glycosyl transferase family 2 ( <i>Methylobacterium extorquens</i> PA1)                                                                       |
| WP_051199780.1 | GH37      | trehalase ( <i>Gramella forsetii</i> KT0803)                                                                                                  |
| WP_051199782.1 | GT2       | two-component system sensor histidine kinase/response regulator, hybrid(one component system) ( <i>Bacteroides thetaiotaomicron</i> VPI-5482) |

Continued on next page

Table S5: (continued)

| Accession No.  | family | Annotation                                                                        |
|----------------|--------|-----------------------------------------------------------------------------------|
| WP_051199787.1 | GT8    | Glycosyl transferase, family 8-glycogenin (Xanthophyllomyces dendrorhous)         |
| WP_051199824.1 | GT2    | glycosyl transferase family 2 (Nonlabens dokdonensis DSW-6)                       |
| WP_051199825.1 | GT*    | glycosyl transferase family 2 (Methylothera mobilis JLW8)                         |
| WP_051199826.1 | GT4    | glycosyl transferase, family 2 (Trichodesmium erythraeum IMS101)                  |
| WP_051199827.1 | GT4    | exopolysaccharide biosynthesis glycosyltransferase EpsF (Nonlabens marinus S1-08) |
| WP_051199828.1 | GT4    | glycosyl transferase, group 1 (Gramella forsetii KT0803)                          |

Table S6: Carbohydrate active enzymes (CAZymes) in the genome of *Gramella portivictoriae* DSM 23547<sup>T</sup>.

| Accession No.  | family               | Annotation                                                                                                                                     |
|----------------|----------------------|------------------------------------------------------------------------------------------------------------------------------------------------|
| WP_026913576.1 | GH*                  | glycosyl hydrolase BNR repeat-containing protein ( <i>Spirosoma linguale</i> DSM 74)                                                           |
| WP_026913589.1 | GT19                 | hypothetical protein BRDCF_04625 ( <i>Bacteroides</i> sp. CF50)                                                                                |
| WP_026913593.1 | GT51                 | penicillin-binding protein 1A ( <i>Croceibacter atlanticus</i> HTCC2559)                                                                       |
| WP_026913628.1 | GT2                  | glycosyl transferase family 2 ( <i>Burkholderia multivorans</i> ATCC 17616)                                                                    |
| WP_026913632.1 | GT4                  | glycosyl transferases group 1 family protein ( <i>Janthinobacterium agaricidamnosum</i> NBRC 102515, DSM 9628)                                 |
| WP_026913633.1 | GT2                  | TuaG-like glycosyl transferase ( <i>Gramella forsetii</i> KT0803)                                                                              |
| WP_026913635.1 | GT2                  | dTDP-4-dehydrorhamnose reductase ( <i>Pseudomonas stutzeri</i> DSM 10701)                                                                      |
| WP_026913639.1 | CBM50                | peptidoglycan-binding protein LysM ( <i>Desulfitobacterium metallireducens</i> DSM 15288)                                                      |
| WP_026913642.1 | GH23,<br>CBM50       | membrane-bound lytic murein transglycosylase ( <i>Gramella forsetii</i> KT0803)                                                                |
| WP_026913667.1 | CBM5                 | SptC ( <i>Natrinema</i> sp. J7-2)                                                                                                              |
| WP_026913672.1 | CE9                  | N-acetylglucosamine-6-phosphate deacetylase/N-acetylmuramic acid 6-phosphate etherase ( <i>Acidiphilium multivorum</i> AIU301)                 |
| WP_026913674.1 | CBM50                | NLP/P60 ( <i>Moorella thermoacetica</i> ATCC 39073)                                                                                            |
| WP_026913687.1 | GT2                  | transmembrane family-2 glycosyl transferase-possibly involved in biofilm formation ( <i>Gramella forsetii</i> KT0803)                          |
| WP_026913689.1 | GT2                  | Dolichol-phosphate mannose synthase, family GT2 ( <i>Zobellia galactanivorans</i> )                                                            |
| WP_026913691.1 | GT2                  | two-component system sensor histidine kinase/response regulator, hybrid (one component system) ( <i>Bacteroides thetaiotaomicron</i> VPI-5482) |
| WP_026913696.1 | GH32                 | sucrose-6-phosphate hydrolase ( <i>Halalkalicoccus jeotgali</i> B3)                                                                            |
| WP_026913701.1 | GT2                  | response regulator receiver modulated diguanylate cyclase ( <i>Geodermatophilus obscurus</i> DSM 43160)                                        |
| WP_026913702.1 | GH32                 | glycosyl hydrolase, family 32 ( <i>Gramella forsetii</i> KT0803)                                                                               |
| WP_026913705.1 | GH32,<br>CBM38       | putative levanase ( <i>Streptomyces scabiei</i> 87.22)                                                                                         |
| WP_026913715.1 | GT2                  | response regulator receiver modulated diguanylate cyclase ( <i>Geodermatophilus obscurus</i> DSM 43160)                                        |
| WP_026913731.1 | PL6-<br>subfamily_1  | secreted alginate lyase-like protein ( <i>Gramella forsetii</i> KT0803)                                                                        |
| WP_026913732.1 | PL12                 | Heparinase II/III family protein ( <i>Cellulophaga algicola</i> DSM 14237)                                                                     |
| WP_026913733.1 | PL17-<br>subfamily_2 | heparinase II/III-like protein ( <i>Alteromonas</i> sp. SN2)                                                                                   |
| WP_026913737.1 | PL7                  | secreted alginate lyase-like protein ( <i>Gramella forsetii</i> KT0803)                                                                        |
| WP_026913738.1 | PL7                  | secreted alginate lyase-like protein ( <i>Gramella forsetii</i> KT0803)                                                                        |
| WP_026913741.1 | GT51                 | penicillin-binding , 1A family protein ( <i>Mesorhizobium huakuii</i> 7653R)                                                                   |
| WP_026913757.1 | GT51                 | monofunctional biosynthetic peptidoglycan transglycosylase ( <i>Gramella forsetii</i> KT0803)                                                  |

Continued on next page

Table S6: (continued)

| Accession No.  | family        | Annotation                                                                                                                                     |
|----------------|---------------|------------------------------------------------------------------------------------------------------------------------------------------------|
| WP_026913759.1 | GT4           | ABC transporter related ( <i>Desulfovibrio desulfuricans</i> subsp. <i>desulfuricans</i> str. ATCC 27774)                                      |
| WP_026913780.1 | GH86,<br>CBM6 | agarase, partial ( <i>Gilvimarinus</i> sp. YN3)                                                                                                |
| WP_026913801.1 | GT35          | multidrug transporter ( <i>Salmonella enterica</i> subsp. <i>enterica</i> serovar <i>Enteritidis</i> str. EC20121177)                          |
| WP_026913833.1 | CBM50         | LysM domain/BON superfamily protein ( <i>Gramella forsetii</i> KT0803)                                                                         |
| WP_026913835.1 | GH99          | mannosidase, endo-alpha, putative ( <i>Schistosoma mansoni</i> )                                                                               |
| WP_026913843.1 | GH97          | Candidate alpha-glucosidase; Glycoside hydrolase family 97 ( <i>Flavobacterium johnsoniae</i> UW101)                                           |
| WP_026913857.1 | GH16          | glycoside hydrolase family 16 ( <i>Emticicia oligotrophica</i> DSM 17448)                                                                      |
| WP_026913858.1 | GH16          | glycosyl hydrolase, family 16 ( <i>Gramella forsetii</i> KT0803)                                                                               |
| WP_026913859.1 | GH3           | beta-glucosidase ( <i>Gramella forsetii</i> KT0803)                                                                                            |
| WP_026913860.1 | GH16          | glycosyl hydrolase, family 16 ( <i>Gramella forsetii</i> KT0803)                                                                               |
| WP_026913861.1 | GH13          | alpha amylase catalytic region ( <i>Eubacterium limosum</i> KIST612)                                                                           |
| WP_026913888.1 | GH130         | glycosidase related protein ( <i>Pedobacter saltans</i> DSM 12145)                                                                             |
| WP_026913891.1 | AA0           | bifunctional heme catalase-peroxidase ( <i>Zunongwangia profunda</i> SM-A87)                                                                   |
| WP_026913900.1 | GT2           | riboflavin biosynthesis protein RibF ( <i>Haliscomenobacter hydrossis</i> DSM 1100)                                                            |
| WP_026913902.1 | GH95,<br>GH1  | hypothetical protein AN3106.2 ( <i>Aspergillus nidulans</i> FGSC A4)                                                                           |
| WP_026913929.1 | CBM50         | L-Ala-D-Glu endopeptidase precursor ( <i>Brevibacillus laterosporus</i> LMG 15441)                                                             |
| WP_026913935.1 | GT5           | glycogen synthase N-terminal domain-like protein ( <i>Gramella forsetii</i> KT0803)                                                            |
| WP_026913989.1 | GT2           | glycosyl transferase family 2 ( <i>Chlorobium limicola</i> DSM 245)                                                                            |
| WP_026913992.1 | GH15          | glycoside hydrolase 15-related ( <i>Chlorobium phaeobacteroides</i> BS1)                                                                       |
| WP_026913993.1 | GT2           | glycosyl transferase, family 2 ( <i>Gramella forsetii</i> KT0803)                                                                              |
| WP_026913994.1 | GH113         | conserved hypothetical protein, secreted ( <i>Gramella forsetii</i> KT0803)                                                                    |
| WP_026913997.1 | GT2           | RfbJ-like lipopolysaccharide biosynthesis glycosyl transferase ( <i>Gramella forsetii</i> KT0803)                                              |
| WP_026913998.1 | GT2           | transmembrane family-2 glycosyl transferase-possibly involved in biofilm formation ( <i>Gramella forsetii</i> KT0803)                          |
| WP_026914018.1 | GH32          | glycosyl hydrolase, family 32 ( <i>Gramella forsetii</i> KT0803)                                                                               |
| WP_026914021.1 | GT2           | hyaluronan synthase ( <i>Gramella forsetii</i> KT0803)                                                                                         |
| WP_026914040.1 | GT2           | transmembrane family-2 glycosyl transferase ( <i>Zunongwangia profunda</i> SM-A87)                                                             |
| WP_026914071.1 | GT2           | dolichol-phosphate mannosyltransferase family protein ( <i>Gramella forsetii</i> KT0803)                                                       |
| WP_026914076.1 | PL6           | alginate lyase precursor ( <i>Formosa agariphila</i> KMM 3901)                                                                                 |
| WP_026914080.1 | GT2           | two-component system sensor histidine kinase/response regulator, hybrid (one component system) ( <i>Bacteroides thetaiotaomicron</i> VPI-5482) |
| WP_026914081.1 | GT*           | putative glycosyl transferase ( <i>Aequorivita sublithicola</i> DSM 14238)                                                                     |
| WP_026914082.1 | GT30          | bifunctional glycosyltransferase/methyltransferase ( <i>Fusobacterium nucleatum</i> subsp. <i>vincentii</i> 3_1_36A2)                          |

Continued on next page

Table S6: (continued)

| Accession No.  | family          | Annotation                                                                                                                        |
|----------------|-----------------|-----------------------------------------------------------------------------------------------------------------------------------|
| WP_026914108.1 | CE4             | protein containing polysaccharide deacetylase domain (Gramella forsetii KT0803)                                                   |
| WP_026914118.1 | PL4-subfamily_5 | hypothetical protein AN4139.2 (Aspergillus nidulans FGSC A4)                                                                      |
| WP_026914157.1 | GT4             | ABC transporter related (Desulfovibrio desulfuricans subsp. desulfuricans str. ATCC 27774)                                        |
| WP_026914190.1 | CBM50           | Peptidoglycan-specific endopeptidase, M23 family protein (Borrelia parkeri SLO)                                                   |
| WP_026914198.1 | GH73, CBM50     | mannosyl-glycoprotein endo-beta-N-acetylglucosamidase family protein (Gramella forsetii KT0803)                                   |
| WP_026914199.1 | GT2             | amino acid adenylation enzyme/thioester reductase family protein (Chamaesiphon minutus PCC 6605)                                  |
| WP_026914246.1 | GT30            | 3-deoxy-D-manno-octulosonic-acid transferase (Gramella forsetii KT0803)                                                           |
| WP_026914250.1 | GT2             | amino acid adenylation enzyme/thioester reductase family protein (Chamaesiphon minutus PCC 6605)                                  |
| WP_026914256.1 | CBM48           | hypothetical protein GFO_0282 (Gramella forsetii KT0803)                                                                          |
| WP_026914325.1 | GH3             | unnamed protein product (Aspergillus oryzae RIB40)                                                                                |
| WP_026914331.1 | CE*             | secreted alpha/beta fold hydrolase-possibly a phospholipase/carboxylesterase (Gramella forsetii KT0803)                           |
| WP_026914332.1 | GH43            | fibronectin type III repeat domain containing secreted glycoside hydrolase, family 43 (Gramella forsetii KT0803)                  |
| WP_026914333.1 | CE15, GH78      | hypothetical protein (uncultured bacterium pUR16A2)                                                                               |
| WP_026914334.1 | GH2, CBM57      | glycoside hydrolase, family 2 (Gramella forsetii KT0803)                                                                          |
| WP_026914356.1 | CBM57           | putative secreted protein (Maribacter sp. HTCC2170)                                                                               |
| WP_026914357.1 | GH8, CBM9       | CHU large protein, candidate b-glycosidase, CBM9 module, Glycoside Hydrolase Family 8 protein (Cytophaga hutchinsonii ATCC 33406) |
| WP_026914371.1 | GT4             | putative glycosyltransferase (Desulfovibrio magneticus RS-1)                                                                      |
| WP_026914378.1 | GH108           | hypothetical protein Z042_16435 (Serratia fonticola RB-25)                                                                        |
| WP_026914396.1 | CBM13           | alpha-L-arabinofuranosidase (Coralloccoccus coralloides DSM 2259)                                                                 |
| WP_026914436.1 | CE11            | UDP-3-O-(3-hydroxymyristoyl) N-acetylglucosamine deacetylase (Desulfomonile tiedjei DSM 6799)                                     |
| WP_026914451.1 | GT4             | ABC transporter related (Desulfovibrio desulfuricans subsp. desulfuricans str. ATCC 27774)                                        |
| WP_026914454.1 | CBM50           | Teichoic acid ABC transporter (Lactococcus lactis subsp. lactis NCDO 2118)                                                        |
| WP_026914458.1 | GT82            | bifunctional beta-1,4-N-acetylgalactosaminyltransferase/CMP-Neu5Ac synthase (Campylobacter jejuni subsp. jejuni 00-2426)          |
| WP_026914460.1 | GT4             | glycosyltransferase (Nonlabens marinus S1-08)                                                                                     |
| WP_026914463.1 | GT2             | glycosyltransferase (Zunongwangia profunda SM-A87)                                                                                |
| WP_026914466.1 | GT2             | DegT/DnrJ/EryC1/StrS aminotransferase (Pectobacterium carotovorum subsp. carotovorum PC1)                                         |
| WP_026914469.1 | GT4             | glycosyl transferase group 1 (Methanohalobium evestigatum Z-7303)                                                                 |
| WP_026914471.1 | GT8             | animal glycogenin, Glycosyltransferase Family 8-like protein (Ramlibacter tataouinensis TTB310)                                   |
| WP_026914472.1 | GT2             | glycosyl transferase (Croceibacter atlanticus HTCC2559)                                                                           |

Continued on next page



Table S6: (continued)

| Accession No.  | family              | Annotation                                                                                                                                     |
|----------------|---------------------|------------------------------------------------------------------------------------------------------------------------------------------------|
| WP_026914473.1 | GT4                 | hypothetical protein IA05_06040 ( <i>Flavobacterium psychrophilum</i> )                                                                        |
| WP_026914476.1 | GT2                 | glycosyl transferase, family 2 ( <i>Gramella forsetii</i> KT0803)                                                                              |
| WP_026914477.1 | GT2                 | glycosyltransferase ( <i>Zunongwangia profunda</i> SM-A87)                                                                                     |
| WP_026914480.1 | GT4                 | glycosyl transferase, group 1 ( <i>Gramella forsetii</i> KT0803)                                                                               |
| WP_026914481.1 | GT4                 | glycosyl transferase, group 1 ( <i>Gramella forsetii</i> KT0803)                                                                               |
| WP_026914483.1 | GT*                 | glycosyl transferase, family 2 ( <i>Gramella forsetii</i> KT0803)                                                                              |
| WP_026914486.1 | GT2                 | glycosyl transferase, family 2 ( <i>Gramella forsetii</i> KT0803)                                                                              |
| WP_026914489.1 | GT4                 | glycosyl transferase, group 1 ( <i>Gramella forsetii</i> KT0803)                                                                               |
| WP_026914490.1 | GT4                 | glycosyl transferase, group 1 ( <i>Gramella forsetii</i> KT0803)                                                                               |
| WP_026914492.1 | GT4                 | glycosyl transferases group 1 ( <i>Gramella forsetii</i> KT0803)                                                                               |
| WP_026914493.1 | GT4                 | glycosyl transferases group 1 ( <i>Gramella forsetii</i> KT0803)                                                                               |
| WP_026914494.1 | GT2                 | hypothetical intercellular adhesion protein A ( <i>Photobacterium profundum</i> SS9)                                                           |
| WP_026914514.1 | GH28                | hypothetical protein VITISV_002009 ( <i>Vitis vinifera</i> )                                                                                   |
| WP_026914524.1 | AA1                 | Multicopper oxidase ( <i>Elizabethkingia anophelis</i> NUHP1)                                                                                  |
| WP_026914541.1 | GT28                | cell division protein FtsW ( <i>Kribbella flavida</i> DSM 17836)                                                                               |
| WP_026914545.1 | GT19                | lipid-A-disaccharide synthase ( <i>Gramella forsetii</i> KT0803)                                                                               |
| WP_026914546.1 | CBM50               | NLP/P60 protein ( <i>Flavobacterium johnsoniae</i> UW101)                                                                                      |
| WP_026914569.1 | GH13-9,<br>CBM48    | 1,4-alpha-glucan branching enzyme ( <i>Gramella forsetii</i> KT0803)                                                                           |
| WP_026914570.1 | GH31                | alpha-glucosidase ( <i>Gramella forsetii</i> KT0803)                                                                                           |
| WP_026914602.1 | CBM50               | cell wall hydrolase/autolysin ( <i>Marinomonas posidonica</i> IVIA-Po-181)                                                                     |
| WP_026914671.1 | GT2                 | two-component system sensor histidine kinase/response regulator, hybrid (one component system) ( <i>Bacteroides thetaiotaomicron</i> VPI-5482) |
| WP_026914672.1 | CE11                | response regulator receiver protein ( <i>Brachyspira murdochii</i> DSM 12563)                                                                  |
| WP_026914738.1 | GH84                | aminopeptidase P homologue (M24 family) ( <i>Schistosoma mansoni</i> )                                                                         |
| WP_026914739.1 | GH*                 | hypothetical protein Celal_1602 ( <i>Cellulophaga algicola</i> DSM 14237)                                                                      |
| WP_026914742.1 | GH13-8,<br>CBM48    | hypothetical protein Csp3_JD02.017 ( <i>Caenorhabditis angaria</i> )                                                                           |
| WP_026914759.1 | CE3                 | hypothetical protein Riv7116_6589 ( <i>Rivularia</i> sp. PCC 7116)                                                                             |
| WP_026914763.1 | CBM50               | peptidase M23B ( <i>Shewanella pealeana</i> ATCC 700345)                                                                                       |
| WP_026914808.1 | CBM9                | CHU large protein ( <i>Cytophaga hutchinsonii</i> ATCC 33406)                                                                                  |
| WP_026914815.1 | GH12                | insulinase family protein ( <i>Mesorhizobium huakuii</i> 7653R)                                                                                |
| WP_026914837.1 | GT66                | peptidyl-prolyl cis-trans isomerase (rotamase) - cyclophilin family ( <i>Candidatus Nitrososphaera evergladensis</i> SR1)                      |
| WP_026914846.1 | GT47                | hypothetical protein VITISV_016911 ( <i>Vitis vinifera</i> )                                                                                   |
| WP_026914858.1 | CE14                | conserved hypothetical protein ( <i>Gramella forsetii</i> KT0803)                                                                              |
| WP_026914867.1 | GT51                | Multimodular transpeptidase-transglycosylase ( <i>Castellaniella defragrans</i> 65Phen)                                                        |
| WP_026914879.1 | GH13,<br>CBM48      | maltooligosyl trehalose hydrolase ( <i>Cellulophaga algicola</i> DSM 14237)                                                                    |
| WP_026914902.1 | GH1                 | beta-galactosidase ( <i>Roseburia hominis</i> A2-183)                                                                                          |
| WP_026914904.1 | GH9                 | glycoside hydrolase family 9 ( <i>Opitutus terrae</i> PB90-1)                                                                                  |
| WP_026914906.1 | GH27                | alpha-galactosidase ( <i>Melioribacter roseus</i> P3M-2)                                                                                       |
| WP_026914911.1 | GH5-<br>subfamily_2 | Endo-beta-1,4-glucanase, family GH5 ( <i>Zobellia galactanivorans</i> )                                                                        |
| WP_026914912.1 | GH39                | transcriptional regulator, AraC family ( <i>Alkaliphilus oremlandii</i> OhILAs)                                                                |

Continued on next page

Table S6: (continued)

| Accession No.  | family | Annotation                                                                                                                                     |
|----------------|--------|------------------------------------------------------------------------------------------------------------------------------------------------|
| WP_026914913.1 | GH26   | Mannan endo-1,4-beta-mannosidase ( <i>Cellulophaga algicola</i> DSM 14237)                                                                     |
| WP_026914915.1 | GH130  | glycosidase, PH1107-related protein ( <i>Zunongwangia profunda</i> SM-A87)                                                                     |
| WP_026914916.1 | GH130  | hypothetical protein CCDG5_2018 ( <i>Clostridium cellulosi</i> )                                                                               |
| WP_026914917.1 | GH26   | Candidate beta-mannanase; Glycoside hydrolase family 26 ( <i>Flavobacterium johnsoniae</i> UW101)                                              |
| WP_026914918.1 | GH5-7  | Candidate beta-glycosidase; Glycoside hydrolase family 5 ( <i>Flavobacterium johnsoniae</i> UW101)                                             |
| WP_026914919.1 | GH3    | Candidate beta-glucosidase; Glycoside hydrolase family 3 ( <i>Flavobacterium johnsoniae</i> UW101)                                             |
| WP_026914920.1 | CBM35  | protein of unknown function (DUF303) ( <i>Thermobacillus composti</i> KWC4)                                                                    |
| WP_026914939.1 | GH63   | periplasmic trehalase-like protein ( <i>Gramella forsetii</i> KT0803)                                                                          |
| WP_026914940.1 | GH2    | beta-galactosidase ( <i>Gramella forsetii</i> KT0803)                                                                                          |
| WP_026914942.1 | GH39   | beta-xylosidase XynB ( <i>Clostridium saccharoperbutylacetonicum</i> N1-4(HMT))                                                                |
| WP_026914949.1 | CE11   | UDP-3-O-(3-hydroxymyristoyl) N-acetylglucosamine deacetylase ( <i>Desulfomonile tiedjei</i> DSM 6799)                                          |
| WP_026914971.1 | GH16   | beta-porphyranease B (GH16) ( <i>Formosa agariphila</i> KMM 3901)                                                                              |
| WP_026914976.1 | GT2    | membrane glycosyl transferase, family 2 ( <i>Gramella forsetii</i> KT0803)                                                                     |
| WP_026914986.1 | CBM50  | 5'-nucleotidase ( <i>Paenibacillus mucilaginosus</i> K02)                                                                                      |
| WP_026915010.1 | CBM50  | peptidase S8 and S53 subtilisin kexin sedolisin ( <i>Halotheothrix orenii</i> H 168)                                                           |
| WP_026915074.1 | GH3    | OmpA/MotB domain protein ( <i>Pedobacter saltans</i> DSM 12145)                                                                                |
| WP_026915112.1 | GT4    | ABC transporter related ( <i>Desulfovibrio desulfuricans</i> subsp. <i>desulfuricans</i> str. ATCC 27774)                                      |
| WP_026915115.1 | GT2    | glycosyl transferase ( <i>Aequorivita sublithicola</i> DSM 14238)                                                                              |
| WP_026915131.1 | GT28   | UDP-N-acetylmuramate/alanine ligase ( <i>Cellulomonas flavigena</i> DSM 20109)                                                                 |
| WP_026915207.1 | GT28   | cell division protein FtsW ( <i>Kribbella flavida</i> DSM 17836)                                                                               |
| WP_026915208.1 | GT28   | undecaprenyldiphospho-muramoylpentapeptide beta-N-acetylglucosaminyltransferase ( <i>Gramella forsetii</i> KT0803)                             |
| WP_026915209.1 | GT28   | UDP-N-acetylmuramate/alanine ligase ( <i>Cellvibrio gilvus</i> ATCC 13127)                                                                     |
| WP_026915228.1 | GT2    | cysteinyl-tRNA synthetase ( <i>Thermobaculum terrenum</i> ATCC BAA-798)                                                                        |
| WP_026915255.1 | GT30   | tetraacyldisaccharide 4'-kinase ( <i>Acidaminococcus intestini</i> RyC-MR95)                                                                   |
| WP_026915256.1 | GT2    | two-component system sensor histidine kinase/response regulator, hybrid (one component system) ( <i>Bacteroides thetaiotaomicron</i> VPI-5482) |
| WP_026915260.1 | GT2    | transmembrane family-2 glycosyl transferase ( <i>Gramella forsetii</i> KT0803)                                                                 |
| WP_026915266.1 | GH18   | chitinase I, partial ( <i>Pantoea dispersa</i> )                                                                                               |
| WP_026915320.1 | CE11   | UDP-3-O-(3-hydroxymyristoyl) N-acetylglucosamine deacetylase ( <i>Desulfomonile tiedjei</i> DSM 6799)                                          |
| WP_026915349.1 | GT66   | peptidyl-prolyl cis-trans isomerase (rotamase) - cyclophilin family ( <i>Candidatus Nitrososphaera evergladensis</i> SR1)                      |

Continued on next page

Table S6: (continued)

| Accession No.  | family         | Annotation                                                                                                                                     |
|----------------|----------------|------------------------------------------------------------------------------------------------------------------------------------------------|
| WP_026915351.1 | GH18           | putative peroxiredoxin ( <i>Peptoclostridium difficile</i> )                                                                                   |
| WP_026915358.1 | GT4            | ABC transporter related ( <i>Desulfovibrio desulfuricans</i> subsp. <i>desulfuricans</i> str. ATCC 27774)                                      |
| WP_026915394.1 | GH3            | O-glycosyl hydrolase family protein (homolog to N-acetylglucosaminidase) ( <i>Halobacillus halophilus</i> DSM 2266)                            |
| WP_026915411.1 | CBM13          | elongation factor Tu ( <i>Streptomyces albulus</i> )                                                                                           |
| WP_026915438.1 | GT2            | two-component system sensor histidine kinase/response regulator, hybrid (one component system) ( <i>Bacteroides thetaiotaomicron</i> VPI-5482) |
| WP_026915458.1 | GH2            | hypothetical protein AN2824.2 ( <i>Aspergillus nidulans</i> FGSC A4)                                                                           |
| WP_026915466.1 | GT2            | WbbL-like lipopolysaccharide biosynthesis glycosyl transferase ( <i>Gramella forsetii</i> KT0803)                                              |
| WP_026915496.1 | GT4            | glycosyl transferase, group 1 ( <i>Gramella forsetii</i> KT0803)                                                                               |
| WP_026915497.1 | GT4            | glycosyl transferase, group 1 ( <i>Gramella forsetii</i> KT0803)                                                                               |
| WP_026915498.1 | GT2            | glycosyl transferase, family 2 ( <i>Gramella forsetii</i> KT0803)                                                                              |
| WP_026915500.1 | GT2            | glycosyl transferase ( <i>Aequorivita sublithicola</i> DSM 14238)                                                                              |
| WP_026915501.1 | GT9            | glycosyl transferase family 9 ( <i>Lacinutrix</i> sp. 5H-3-7-4)                                                                                |
| WP_026915515.1 | GH13-11        | glycogen debranching protein ( <i>Salmonella enterica</i> subsp. <i>enterica</i> serovar <i>Enteritidis</i> str. EC20121179)                   |
| WP_026915546.1 | CBM50          | LysM domain-containing protein ( <i>Zunongwangia profunda</i> SM-A87)                                                                          |
| WP_026915567.1 | CE*            | conserved hypothetical protein, secreted ( <i>Gramella forsetii</i> KT0803)                                                                    |
| WP_026915604.1 | GH43           | aldose 1-epimerase ( <i>Prevotella denticola</i> F0289)                                                                                        |
| WP_026915611.1 | GH13-7         | alpha-amylase ( <i>Gramella forsetii</i> KT0803)                                                                                               |
| WP_026915615.1 | GH32           | Sucrose-6-phosphate hydrolase ( <i>Klebsiella pneumoniae</i> JM45)                                                                             |
| WP_026915617.1 | GH65           | beta-phosphoglucomutase ( <i>Anabaena</i> sp. 90)                                                                                              |
| WP_026915618.1 | GH65           | trehalose/maltose phosphorylase (GH65) ( <i>Formosa agariphila</i> KMM 3901)                                                                   |
| WP_026915619.1 | GH13           | alpha amylase ( <i>Gramella forsetii</i> KT0803)                                                                                               |
| WP_026915620.1 | GH13           | alpha amylase ( <i>Gramella forsetii</i> KT0803)                                                                                               |
| WP_026915663.1 | CBM13          | hypothetical protein; putative Ricin B lectin and Actin-like ATPase domains ( <i>Frankia alni</i> ACN14a)                                      |
| WP_026915682.1 | GH96,<br>CBM6  | agarase ( <i>Thalassotalea agarivorans</i> )                                                                                                   |
| WP_026915683.1 | CBM5,<br>GH5-2 | CelA8 ( <i>Pseudoalteromonas haloplanktis</i> )                                                                                                |
| WP_026915684.1 | CBM13          | flavastacin ( <i>Corallocooccus coralloides</i> DSM 2259)                                                                                      |
| WP_026915685.1 | CBM13          | flavastacin ( <i>Corallocooccus coralloides</i> DSM 2259)                                                                                      |
| WP_026915698.1 | GT2            | NAD-dependent epimerase/dehydratase ( <i>Agrobacterium</i> sp. H13-3)                                                                          |
| WP_026915702.1 | GT2            | glycosyl transferase ( <i>Belliella baltica</i> DSM 15883)                                                                                     |
| WP_026915703.1 | GT2            | DegT/DnrJ/EryC1/StrS aminotransferase ( <i>Pectobacterium carotovorum</i> subsp. <i>carotovorum</i> PC1)                                       |
| WP_026915712.1 | GT2            | acetyltransferase (isoleucine patch superfamily) ( <i>Rivularia</i> sp. PCC 7116)                                                              |
| WP_026915716.1 | GT82           | bifunctional<br>beta-1,4-N-acetylgalactosaminyltransferase/CMP-Neu5Ac synthase ( <i>Campylobacter jejuni</i> subsp. <i>jejuni</i> 00-2426)     |
| WP_026915723.1 | GT2            | Glycosyltransferase ( <i>Idiomarina loihiensis</i> L2TR)                                                                                       |
| WP_026915724.1 | GT4            | glycosyl transferase, group 1 ( <i>Gramella forsetii</i> KT0803)                                                                               |

Continued on next page

Table S6: (continued)

| Accession No.  | family       | Annotation                                                                                                            |
|----------------|--------------|-----------------------------------------------------------------------------------------------------------------------|
| WP_026915728.1 | CE4          | polysaccharide deacetylase ( <i>Bacteroides helcogenes</i> P 36-108)                                                  |
| WP_026915729.1 | GT4          | glycosyl transferase, group 1 ( <i>Gramella forsetii</i> KT0803)                                                      |
| WP_026915731.1 | GT4          | capsular polysaccharide biosynthesis glycosyl transferase ( <i>Gramella forsetii</i> KT0803)                          |
| WP_026915732.1 | GT4          | glycosyl transferase possibly involved in lipopolysaccharide synthesis ( <i>Rivularia</i> sp. PCC 7116)               |
| WP_026915755.1 | GT5          | phytochrome b, partial ( <i>Mnesithea seloana</i> )                                                                   |
| WP_026915760.1 | AA6          | TrpR binding protein WrbA ( <i>Exiguobacterium</i> sp. MH3)                                                           |
| WP_026915764.1 | GT4          | ABC transporter related ( <i>Desulfovibrio desulfuricans</i> subsp. <i>desulfuricans</i> str. ATCC 27774)             |
| WP_026915801.1 | GT2,<br>GH17 | glycosyl transferase family 2 ( <i>Starkeya novella</i> DSM 506)                                                      |
| WP_026915802.1 | GT4          | probable galactosyltransferase ( <i>Zunongwangia profunda</i> SM-A87)                                                 |
| WP_026915848.1 | GT2          | glycosyl transferase, family 2 ( <i>Zunongwangia profunda</i> SM-A87)                                                 |
| WP_026915850.1 | GH5-42       | glycosidase ( <i>Zunongwangia profunda</i> SM-A87)                                                                    |
| WP_026915851.1 | GT4          | glycosyltransferase ( <i>Zunongwangia profunda</i> SM-A87)                                                            |
| WP_026915857.1 | GT4          | Mannose-1-phosphate guanylyltransferase (GDP) ( <i>Burkholderia phymatum</i> STM815)                                  |
| WP_026915867.1 | GT2          | transmembrane family-2 glycosyl transferase-possibly involved in biofilm formation ( <i>Gramella forsetii</i> KT0803) |
| WP_026915871.1 | GT2          | undecaprenyl-phosphate 4-deoxy-4-formamido-L-arabinose transferase-like protein ( <i>Gramella forsetii</i> KT0803)    |
| WP_026915876.1 | CBM14        | CG33173 ( <i>Drosophila melanogaster</i> )                                                                            |
| WP_026915971.1 | GT66         | dolichyl-diphosphooligosaccharide-protein glycotransferase ( <i>Candidatus Nitrososphaera gargensis</i> Ga9.2)        |
| WP_026915989.1 | AA*          | glucoside 3-dehydrogenase ( <i>Gramella forsetii</i> KT0803)                                                          |
| WP_026916000.1 | GH0          | hypothetical protein Celal_0179 ( <i>Cellulophaga algicola</i> DSM 14237)                                             |
| WP_026916004.1 | GT20         | trehalose 6-phosphate synthase/phosphatase ( <i>Gramella forsetii</i> KT0803)                                         |
| WP_026916005.1 | GH15         | glycosyl hydrolase, family 15 ( <i>Gramella forsetii</i> KT0803)                                                      |
| WP_026916021.1 | GT2          | undecaprenyl-phosphate 4-deoxy-4-formamido-L-arabinose transferase ( <i>Gramella forsetii</i> KT0803)                 |
| WP_026916029.1 | GH23         | membrane-bound lytic murein transglycosylase ( <i>Gramella forsetii</i> KT0803)                                       |
| WP_026916053.1 | CE11         | DDX20_HUMAN Probable ATP-dependent RNA helicase DDX20 (ISS) ( <i>Ostreococcus tauri</i> )                             |
| WP_026916056.1 | GT4          | nicotinate-nucleotide pyrophosphorylase (carboxylating) ( <i>Flexibacter litoralis</i> DSM 6794)                      |
| WP_026916092.1 | GT4          | ABC transporter related ( <i>Desulfovibrio desulfuricans</i> subsp. <i>desulfuricans</i> str. ATCC 27774)             |
| WP_026916093.1 | CBM0         | hypothetical protein GFO_1460 ( <i>Gramella forsetii</i> KT0803)                                                      |
| WP_026916105.1 | GH39         | beta-xylosidase XynB ( <i>Clostridium saccharoperbutylacetonicum</i> N1-4(HMT))                                       |
| WP_026916109.1 | GH72         | Rab1 family GTPase (PiYpt1) putative ( <i>Albugo laibachii</i> Nc14)                                                  |
| WP_026916149.1 | GT2          | UDP-glucose 4-epimerase ( <i>Cyanothece</i> sp. PCC 7822)                                                             |
| WP_026916161.1 | GT51         | bifunctional transglycosylase/transpeptidase penicillin-binding protein ( <i>Zunongwangia profunda</i> SM-A87)        |
| WP_026916174.1 | GT4          | glycosyl transferase, group 1 ( <i>Gramella forsetii</i> KT0803)                                                      |

Continued on next page

Table S6: (continued)

| Accession No.  | family        | Annotation                                                                                                                   |
|----------------|---------------|------------------------------------------------------------------------------------------------------------------------------|
| WP_026916224.1 | GH18,<br>GH31 | hypothetical protein AN8217.2 ( <i>Aspergillus nidulans</i> FGSC A4)                                                         |
| WP_026916228.1 | GT49          | predicted protein ( <i>Phaeodactylum tricornutum</i> CCAP 1055/1)                                                            |
| WP_026916233.1 | GT4           | glycosyl transferase, group 1 ( <i>Gramella forsetii</i> KT0803)                                                             |
| WP_026916234.1 | GH3           | family 3 glycosyl hydrolase/beta-lactamase fusion protein ( <i>Gramella forsetii</i> KT0803)                                 |
| WP_026916239.1 | GH25          | hypothetical protein SALIVB_1060 ( <i>Streptococcus salivarius</i> CCHSS3)                                                   |
| WP_026916251.1 | GT2           | hypothetical protein SCE1572_45215 ( <i>Sorangium cellulosum</i> So0157-2)                                                   |
| WP_026916254.1 | GT2           | transmembrane family-2 glycosyl transferase ( <i>Gramella forsetii</i> KT0803)                                               |
| WP_026916257.1 | CE4           | membrane protein containing polysaccharide deacetylase domain ( <i>Gramella forsetii</i> KT0803)                             |
| WP_026916272.1 | GH1           | mannose-6-phosphate isomerase, class I/beta-galactosidase ( <i>Roseburia intestinalis</i> XB6B4)                             |
| WP_026916273.1 | GT83          | ArnT-like undecaprenyl-phosphate alpha-4-amino-4-deoxy-L-arabinose arabinosyl transferase ( <i>Gramella forsetii</i> KT0803) |
| WP_026916307.1 | CE11          | LpxC/FabZ bifunctional enzyme ( <i>Gramella forsetii</i> KT0803)                                                             |
| WP_026916321.1 | GT4           | glycosyl transferase, group 1 ( <i>Zunongwangia profunda</i> SM-A87)                                                         |
| WP_026916344.1 | CE14          | hypothetical protein GFO_1816 ( <i>Gramella forsetii</i> KT0803)                                                             |
| WP_026916357.1 | GH16          | glycosyl hydrolase, family 16 ( <i>Gramella forsetii</i> KT0803)                                                             |
| WP_026916364.1 | CE3           | hypothetical protein Riv_71166589 ( <i>Rivularia</i> sp. PCC 7116)                                                           |
